## **4'-Fluorouridine mitigates lethal infection with pandemic human and highly pathogenic avian influenza viruses**

Carolin M Lieber<sup>1</sup>, Megha Aggarwal<sup>1</sup>, Jeong-Joong Yoon<sup>1</sup>, Robert M Cox<sup>1</sup>, Julien Sourimant<sup>1</sup>, Mart Toots<sup>1</sup>, Hae-Ji Kang<sup>1</sup>, Scott K Johnson<sup>2</sup>, Cheryl A Jones<sup>2</sup>, Zachary M Sticher<sup>3</sup>, Alexander A Kolykhalov<sup>3</sup>, Manohar T Saindane<sup>3</sup>, Stephen M Tompkins<sup>2</sup>, Oliver Planz<sup>4</sup>, George R Painter<sup>3</sup>, Michael G Natchus<sup>3</sup>, Kaori Sakamoto<sup>5</sup>, Richard K Plemper<sup>1\*</sup>

<sup>1</sup>Center for Translational Antiviral Research, Georgia State University Institute for Biomedical Sciences, Atlanta, GA, 30303, USA.

<sup>2</sup>Center for Vaccines and Immunology, University of Georgia, Athens, GA, 30602, USA

<sup>3</sup>Emory Institute for Drug Development, Emory University, Atlanta, GA, 30329, USA

<sup>4</sup>Department of Immunology, Interfaculty Institute for Cell Biology, Eberhard Karls University Tübingen, Tübingen, Germany

<sup>5</sup>Department of Pathology, College of Veterinary Medicine, University of Georgia, Athens, GA, 30602, USA.

Keywords: influenza virus, pandemic preparedness, antiviral, nucleoside analog, 4'-Fluorouridine

\*Corresponding author: [rplemper@gsu.edu](mailto:rplemper@gsu.edu)

## Abstract

1 Influenza outbreaks are associated with substantial morbidity, mortality and economic burden. Next  
2 generation antivirals are needed to treat seasonal infections and prepare against zoonotic spillover of  
3 avian influenza viruses with pandemic potential. Having previously identified oral efficacy of the  
4 nucleoside analog 4'-Fluorouridine (4'-FIU, EIDD-2749) against SARS-CoV-2 and respiratory syncytial  
5 virus, we explored activity of the compound against seasonal and highly pathogenic influenza (HPAI)  
6 viruses in cell culture, human airway epithelium organoids, and/or two animal models, ferrets and mice,  
7 that assess IAV transmission and lethal viral pneumonia, respectively. 4'-FIU inhibited a panel of  
8 relevant influenza A and B viruses with nanomolar potency in organoids. *In vitro* polymerase assays  
9 revealed immediate chain termination of IAV polymerase after 4'-FIU incorporation, in contrast to  
10 delayed chain termination of SARS-CoV-2 and RSV polymerase. Once-daily oral treatment of ferrets  
11 with 2 mg/kg 4'-FIU initiated 12 hours after infection rapidly stopped virus shedding and prevented  
12 direct-contact transmission to untreated sentinels. Treatment of mice infected with a lethal inoculum of  
13 pandemic A/CA/07/2009 (H1N1)pdm09 (Ca09) with 2 mg/kg 4'-FIU alleviated pneumonia. Three doses  
14 mediated complete survival when treatment was initiated up to 60 hours after infection, indicating an  
15 unusually broad window for effective intervention. Therapeutic oral 4'-FIU ensured survival of animals  
16 infected with HPAI A/VN/12/2003 (H5N1) and of immunocompromised mice infected with pandemic  
17 Ca09. Recoverees were fully protected against homologous reinfection. This study defines the  
18 mechanistic foundation for high sensitivity of influenza viruses to 4'-FIU and supports 4'-FIU as  
19 developmental candidate for the treatment of seasonal and pandemic influenza.

## 21 Author Summary

22 Next-generation antiviral therapeutics are needed to better mitigate seasonal influenza and  
23 prepare against zoonotic virus spillover from animal reservoirs. At greatest risk are the  
24 immunocompromised and patients infected with highly pathogenic influenza viruses. In this study, we  
25 have demonstrated efficacy of a broad-spectrum nucleoside analog, 4'-fluorouridine, against a  
26 representative panel of influenza viruses in cell culture, human organoids, and two animal models,

27 ferrets and mice. Acting as an immediate chain terminator of the influenza virus polymerase, once-daily  
28 oral treatment protected against lethal infection with seasonal and highly pathogenic avian influenza  
29 viruses, prevented direct-contact transmission to untreated sentinels, and mitigated lethal infection of  
30 immunocompromised hosts. These results support the developmental potential of 4'-fluorouridine for  
31 treatment of vulnerable patient groups and mitigation of pandemic influenza, providing a much-needed  
32 additional therapeutic option for improved disease management.

33

## 34 **Introduction**

35 Influenza A viruses (IAV) are zoonotic negative sense, segmented RNA viruses with high  
36 pandemic potential [1]. Wild aquatic birds are a major natural reservoir for avian influenza viruses,  
37 creating high opportunity for spread into the poultry industry and spillover of HPAI viruses into the  
38 human population with potentially catastrophic consequences [2, 3]. The 2021-2022 H5N1 HPAID  
39 epidemic specifically is the largest on record, having reached an unprecedented geographical  
40 expansion and requiring the culling of 48 million birds so far [4]. Approximately 14 IAV pandemics have  
41 occurred in the past 500 years [5], six of which were concentrated in the last 120 years alone. Most  
42 deadly of these outbreaks was the 1918 “Spanish Flu” pandemic, which was caused by an H1N1  
43 subtype IAV of unusual virulence that accounted for approximately 500 million infected people,  
44 equating to nearly a third of the world population at the time, and 50 million death [6]. Case fatality rates  
45 were particularly high in young children, 20-40 year old adults, and the elderly above 65 years of age  
46 [6]. Subsequent pandemics in the 20<sup>th</sup> century included the Asian influenza of 1957 and the Hong Kong  
47 influenza of 1968, which were caused by IAV of H2N2 and H3N2 subtypes, respectively [7], and the  
48 swine origin H1N1 outbreak of 2009 [8]. Although considered less pathogenic than several of the earlier  
49 pandemic strains, pdm09 IAV is still estimated to have caused 151,000 to 575,400 deaths worldwide  
50 and major economic damage [9].

51 Influenza viruses cause rapid-onset disease with high fever, cough, body aches, rhinorrhea, and  
52 nasal congestion [10]. Advance to severe disease is marked by virus invasion of the small airways and  
53 viral pneumonia, which can lead to sepsis due to a hyperinflammatory systemic response [11]. Other

54 serious complications include myocarditis, encephalitis, myositis, and multi-organ failure [12, 13]. At  
55 greatest risk of life-threatening influenza are children less than 2 years of age, older adults, pregnant  
56 women, and patients with pre-existing conditions such as asthma, diabetes, or chronic heart disease  
57 [14]. Vaccine prophylaxis is available, but the efficacy of the seasonal tetravalent influenza vaccine is  
58 moderate, ranging from 40 to 60% even under optimal conditions in interpandemic years [15].  
59 Effectiveness of the vaccine can be substantially lower in older adults, who are at greatest risk of  
60 progressing to severe disease, or when vaccine components and circulating strains are poorly matched  
61 [15]. Multiple avenues are being pursued to develop a broad-spectrum influenza vaccine, but none  
62 have yet achieved regulatory approval [16].

63 To improve disease management especially in vulnerable patient groups, rapidly respond to  
64 endemic outbreaks of seasonal influenza when the vaccine is not optimally matched, and to prepare for  
65 the pandemic threat originating from zoonotic transmission of HPAI viruses, effective therapeutics with  
66 a higher barrier against viral resistance are urgently needed. Three classes of antiviral drugs have  
67 received approval by the FDA for treatment of influenza thus far. The M2 channel blocking  
68 adamantanes (amantadine and rimantadine), the neuraminidase inhibitors (oral oseltamivir, inhaled  
69 zanamivir, intravenous peramivir), and, most recently, the PA endonuclease inhibitor baloxavir marboxil  
70 [17]. Of these, use of the adamantanes has been discontinued due to widespread pre-existing  
71 resistance in human influenza viruses and natural IAV reservoirs [18]. Pre-existing signature resistance  
72 mutations against the neuraminidase inhibitors were furthermore detected in 2009 pandemic viruses  
73 [19], giving rise to the concern that future effectiveness of this inhibitor class may be questionable [20].  
74 Although baloxavir marboxil is the newest influenza drug, resistance has developed rapidly and was  
75 even observed in human patients during the early clinical trials, resulting in rebound of virus replication  
76 [21-23]. Novel therapeutic options are therefore needed to broaden the available anti-influenza virus  
77 drug arsenal.

78 In search of suitable broad-spectrum developmental candidates, we explored in this study antiviral  
79 potency, *in vivo* efficacy, and mechanism of action of 4'-FIU against the influenza virus indication.  
80 Recently, we reported that 4'-FIU is a highly potent inhibitor of SARS-CoV-2 and pathogens of the

81 mononegavirus order [24, 25], establishing oral efficacy in animal models of SARS-CoV-2 and  
82 respiratory syncytial virus (RSV) infection. Having demonstrated that this nucleoside analog functions  
83 as an immediate chain terminator of influenza virus polymerase, we assessed oral efficacy in two  
84 different animal models, mice and ferrets, against pandemic human and HPAI viruses. Influenza  
85 treatment paradigms developed in these models outline an unusually broad time window for successful  
86 therapeutic interference with a lethal viral challenge. These results support the development of 4'-FIU  
87 as a therapeutic candidate for the treatment of influenza with the potential to improve preparedness  
88 against zoonotic spillover of avian IAVs with pandemic potential into the human population.

89

## 90 **Results**

91 To explore whether the indication spectrum of 4'-FIU (Fig 1a) extends to the orthomyxoviruses, we  
92 examined activity of the compound against seasonal and pandemic IAVs representing H1N1 and H3N2  
93 subtypes and against a representative influenza B virus (IBV) isolate in cell culture (Fig 1b). In parallel,  
94 we generated human airway epithelium organoids grown at air-liquid interface from a healthy donor and  
95 tested inhibition of pandemic Ca09 through basolateral 4'-FIU (Fig 1c), and determined activity against  
96 a recombinant A/WSN/33 (H1N1)-based reporter virus [26] on non-differentiated primary HAE cells  
97 representing 10 distinct donors (S1 Fig). All viral isolates tested were highly sensitive to the compound,  
98 returning 50% and 90% inhibitory concentrations ( $EC_{50}$  and  $EC_{90}$ , respectively) in the nanomolar range  
99 with steep Hill slopes. Combined with a 50% cytotoxic concentration ( $CC_{50}$ ) of 4'-FIU of 468  $\mu$ M [24] in  
100 primary HAEs from the same donor as used in the organoid model, we calculated a selectivity index (SI  
101 =  $CC_{50}/EC_{50}$ ) of 4'-FIU against pandemic Ca09 of 15,600 in this disease-relevant human tissue model.

### 102 **4'-FIU is an immediate chain terminator of influenza virus polymerase**

103 Through biochemical RdRP assays using purified recombinant RSV and SARS-CoV-2 polymerase  
104 complexes and synthetic template RNA, we have demonstrated that incorporation of 4'-FIU  
105 triphosphate (4'-FIU-TP) into nascent chain RNA triggers delayed termination of the RNA-dependent  
106 RNA polymerases from a negative sense (RSV) and a positive sense (SARS-CoV-2) RNA virus.  
107 Whereas variations in stalling efficiencies were observed between sequences and polymerase, position

108 *i*+3 marked the predominant stalling site [24]. Following expression of IAV RdRP PA, PB1, and PB2  
109 subunits in insect cells, we subjected affinity chromatography purified, reconstituted IAV polymerase to  
110 the equivalent biochemical RdRP assay in the presence of increasing concentrations of 4'-FIU-TP or  
111 UTP (Figs 1d and 1e, S2a to S2e Figs). 4'-FIU-TP was incorporated instead of UTP when the  
112 polymerase reached the first adenosine in the template RNA as we had noted before in RSV and  
113 SARS-CoV-2 RdRP assays [24], but then triggered immediate chain termination of IAV RdRP.  
114 Densitometric quantitation of relative amplicon intensities to compare incorporation rates of the analog  
115 relative to UTP revealed an approximately 4-fold higher affinity of IAV polymerase for endogenous UTP  
116 than for 4'-FIU-TP (Fig 1f).

117 These results demonstrate high sensitivity of influenza virus polymerases to 4'-FIU and identify  
118 sequence-independent immediate chain termination at position *i* as a predominant mechanism of  
119 influenza virus RdRP inhibition by the compound.

#### 120 **Pharmacokinetic (PK) properties of 4'-FIU in mouse plasma and tissues**

121 We have previously demonstrated oral bioavailability of 4'-FIU in ferrets and efficient intracellular  
122 anabolism to 4'-FIU-TP with prolonged tissue exposure levels [24]. To assess cross-species  
123 conservation of PK profiles between IAV efficacy models used in this study, ferrets and mice, we  
124 subjected the compound to a single-dose oral PK study in mice, measuring 4'-FIU plasma  
125 concentrations and corresponding 5'-triphosphate levels in selected soft tissues after oral dosing at 1.5  
126 mg/kg body weight (Figs 2a and 2b). Free 4'-FIU reached a maximal plasma exposure of approximately  
127 1  $\mu$ M 90 minutes after oral administration, far exceeding the cell culture EC<sub>90</sub> concentration against the  
128 influenza virus test panel. Plasma levels were sustained high over a 12-hour period after dosing.  
129 Corresponding 4'-FIU-TP tissue exposure levels 12 hours after dosing were approximately 1 nmol/g  
130 tissue in all organs but brain and kidney, underscoring suitability of 4'-FIU for *in vivo* efficacy testing  
131 against IAV.

#### 132 **Late-onset treatment with 4'-FIU mediates complete survival of IAV-infected animals**

133 For mouse efficacy studies, animals were infected intranasally with a lethal inoculum amount of  
134 pandemic Ca09, which replicates efficiently in mice without a requirement for species adaptation [27].

135 Infection results in severe viral pneumonia with major clinical signs such as weight loss and  
136 hypothermia. To establish the lowest efficacious dose, we examined 3 4'-FIU dose levels in a survival  
137 study, each administered by oral gavage on three consecutive days in a once daily (q.d.) regimen  
138 starting at the time of infection (Fig 2c). All animals treated at the 2 mg/kg dose level survived, whereas  
139 all mice of the vehicle-treated and lowest dose (0.08 mg/kg) groups succumbed to infection within 5  
140 days of inoculation (Fig 2d) and experienced clinical signs (S3a and S3b Figs). Animals receiving the  
141 intermediate 4'-FIU dose (0.4 mg/kg) had prolonged survival, but ultimately all died.

142 Having established 2 mg/kg 4'-FIU administered q.d. as a low efficacious dose, we next  
143 determined the latest time for initiation of effective treatment at this dose level (Fig 2e). All vehicle-  
144 treated animals again succumbed to infection within 5 days of inoculation (Fig 2f). In contrast, treatment  
145 start at 2.5 days after infection, which corresponds to 0.5 days after the onset of major clinical signs  
146 (S3c and S3d Figs) ensured complete survival, and 80% of animals of a group receiving the first dose 3  
147 days after infection survived, outlining a broad therapeutic time window for treatment of influenza with  
148 4'-FIU. Therapeutic benefit of late-onset treatment was corroborated by a significant reduction in lung  
149 virus load compared to vehicle-treated controls at 4.5 days after infection, determined in a parallel set  
150 of equally treated animals (Fig 2g). Within 7 days, virus became undetectable in lungs of animals that  
151 were treated starting 24 hours after infection with oral 4'-FIU (2 mg/kg q.d.; 3 doses total), indicating  
152 that viral replication had ceased (Fig 2h). No rebound of virus replication was observed within a 9-day  
153 period after infection (S3e and S3f Figs). These results define a broad therapeutic time window for  
154 effective treatment of IAV infection with 4'-FIU.

155 To determine the minimal number of oral 4'-FIU doses (2 mg/kg q.d.) for complete survival, we  
156 again initiated treatment 24 hours after infection, in this study comparing the effect of a single vs double  
157 or triple doses (Fig 2i). Lung virus load was assessed 4.5 days after infection and survival monitored in  
158 a parallel set of equally treated animals. The number of doses administered correlated with antiviral  
159 effect size, but even a single dose of 4'-FIU resulted in a statistically significant reduction in lung virus  
160 load of approximately one order of magnitude (Fig 2j). Reduced viral burden translated to survival of

161 some animals in the single and double dose groups. However, three doses were required for full  
162 therapeutic benefit (Fig 2k) and only mild clinical signs (S3g and S3h Figs).

#### 163 **4'-FIU effect on IAV transmission in the ferret model**

164 Since mice, in contrast to ferrets, do not shed IAVs, we next explored anti-IAV efficacy of 4'-FIU in  
165 the ferret model. Guided by the dosing regimen established in mice, we treated animals infected  
166 intranasally with Ca09 with either 2 mg/kg (standard dose) or 0.5 mg/kg (low dose), administered orally  
167 starting 24 hours after infection (Fig 3a). Animals received one (2 mg/kg level) or two doses (either 2 or  
168 0.5 mg/kg level) total. Fever is the predominant clinical sign associated with Ca09 IAV infection in  
169 ferrets. Monitoring body temperature continuously telemetrically, we observed significant reduction in all  
170 treated animals within 24 hours of the first dose, whereas vehicle-treated animals showed a prolonged  
171 fever plateau (S4a Fig). Viral titers in nasal lavages were statistically significantly reduced compared to  
172 those of vehicle animals, but effect size was lower in animals of the low dose than the standard dose  
173 group, and virus rebounded 2.5 days after infection in the single standard dose group (Fig 3b). In  
174 contrast, two standard doses 4'-FIU given q.d. were sterilizing within 2 days of treatment initiation. Virus  
175 load in nasal turbinates assessed 4 days after infection corroborated the lavage titers, revealing a dose-  
176 dependent significant antiviral effect of two doses, whereas a single dose had no significant effect on  
177 virus titer in turbinates at the time of tissue harvest (Fig 3c). Examination of lower respiratory tract  
178 tissues, trachea, and bronchoalveolar lavage fluid (BALF) revealed, however, that a single standard  
179 dose of 4'-FIU administered at the time of onset of clinical signs completely suppressed the  
180 development of viral pneumonia (Fig 3d).

181 To determine the effect of 4'-FIU on virus spread, we treated in a direct-contact transmission study  
182 source ferrets infected with Ca09 with the compound as before, starting 12 or 24 hours after infection  
183 (Fig 3e). Co-housing of source ferrets with untreated sentinels in a 1:1 ratio was initiated 2.5 days after  
184 study start. Ca09 rapidly spread from vehicle-treated source ferrets to their direct contacts, which first  
185 became virus-positive in nasal lavages only 12 hours after the beginning of co-housing (Fig 3f) and had  
186 progressed to viral pneumonia with high turbinate, lung and trachea virus load by study end (Fig 3g and  
187 3h) and clinical signs (S4b and S4e Figs). Treatment of source animals with 4'-FIU initiated 12 or 24



188 hours after infection in each case resulted in exponential decline in shed virus load, but virus was  
189 undetectable in lavages of the 12-hour treatment group by the time of co-housing whereas  
190 approximately  $10^4$  TCID<sub>50</sub> units/ml lavage remained detectable in lavages of the 24-hour treatment  
191 group at that time. We did not detect any virus transmission to untreated sentinels of the 12-hour group.  
192 However, low-grade transmission to direct contacts of the 24-hour treatment group occurred,  
193 characterized by delayed onset of virus shedding compared to sentinels of vehicle-treated source  
194 animals and a reduced peak shed virus load (Fig 3h). Shedding from all sentinels that became virus-  
195 positive ceased approximately 12 days after the beginning of co-housing. These results confirm cross-  
196 species anti-IAV efficacy of 4'-FIU, reveal that a single oral dose is sufficient to prevent advance to  
197 severe influenza, and demonstrate a shortened window in which a treated case remains fully infectious.

#### 198 **Mitigation of IAV pathogenesis and lung histopathology by 4'-FIU**

199 To better understand the impact of 4'-FIU on mitigating immunopathogenesis, the major driver of  
200 clinical signs associated with influenza virus infection, we determined inflammatory cytokine profiles for  
201 a 10-day period after infection of mice with Ca09 using a 6-plex Th17 cytokine assay (Fig 4a). Treated  
202 animals received the 3-dose standard 4'-FIU regimen as before, started 24 hours after infection. Lung  
203 tissue for histopathology was extracted from parallel sets of equally treated animals 5 or 21 days after  
204 infection. Lung titers in vehicle-treated animals demonstrated fast-onset viral pneumonia, approaching  
205 a burden of  $10^6$  infectious units/g lung tissue 4 days after infection, when all animals of the vehicle  
206 group had succumbed to infection with major clinical signs (Fig 4b, S5a and S5b Figs). Pro-  
207 inflammatory cytokines rapidly increased in the BALF of these animals, revealing a very strong antiviral  
208 response until death of the vehicle animals as expected after infection with Ca09 (Figs 4c and 4d, S6  
209 Fig). Treatment with 4'-FIU again efficiently suppressed virus replication within 24 hours of the first dose  
210 (Fig 4b). Coinciding with the reduction in virus burden of treated animals by approximately two orders of  
211 magnitude by day 3 after infection, the proinflammatory response was greatly alleviated (Figs 4c and  
212 4d, S6 Fig) and all treated animals survived (S5a Fig).

213 Consistent with a better clinical outcome (S7a and S7b Figs), lowered viral load, and mitigated  
214 innate antiviral response in 4'-FIU treated vehicle animals, analysis of lung histopathology 5 days after

215 infection revealed reduced lung lesions and alleviated cellular infiltrates in lung tissue of treated animals  
216 (Fig 4e, S8 Fig). Overall combined histopathology scores of individual animals representing the degree  
217 of cellular infiltrates into alveoli and bronchioles, the extent of perivascular cuffing, and the severity of  
218 interstitial pneumonia, pleuritis, and vasculitis were statistically significantly lower in the treatment than  
219 vehicle group (Fig 4f, S9 Fig).

#### 220 **4'-FIU control of influenza in immunocompromised hosts and of HPAI infection**

221 In the clinic, the risk of progression to severe disease and poor overall outcome is greatly  
222 increased when immunocompetence of the patient is impaired or after zoonotic spillover of HPAs into  
223 the human population [28, 29]. To first assess the potential of 4'-FIU to pharmacologically manage  
224 influenza in high-risk hosts, we infected interferon  $\alpha/\beta$  receptor knockout (IFNAR1 KO) and V(D)J  
225 recombination activation gene RAG-1 KO mice with Ca09. Whereas the former cannot mount an  
226 effective type I IFN innate response [30, 31], the latter are compromised in their cell-mediated adaptive  
227 immunity due to a lack of mature T and B cells [32]. Oral treatment with 4'-FIU was initiated 24 hours  
228 after infection at standard and a high-dose (10 mg/kg) level, then continued q.d. for a total of 7 doses of  
229 each group (Fig 5a). Independent of 4'-FIU dose level, all treated animals of the RAG-1 KO and  
230 IFNAR1 KO groups survived, whereas all animals in the vehicle-treated groups developed severe  
231 clinical signs (S10a to S10d Figs) and succumbed to infection within 4 days (Fig 5b). Reduction in lung  
232 virus load of treated vs vehicle animals after three q.d. 4'-FIU doses (day 4 after infection) was dose  
233 level-dependent, but even at the standard dose, this reduction exceeded two orders of magnitude in  
234 either knockout mouse strain (Fig 5c).

235 Next, we explored 4'-FIU efficacy against HPAs, initially testing potency against polymerases  
236 derived from A/CA/07/2009 (H1N1), A/VN/12/2003 (H5N1), and A/Anhui/1/2013 (H7N9) in minireplicon  
237 dose-response assays (Fig 5d). The compound dose-dependently inhibited activity of either HPAI-  
238 derived polymerase complex, reaching active concentrations resembling that observed against Ca09  
239 RdRP. Selecting A/VN/12/2003 (H5N1), which causes lethal encephalitis in mice [33], for a proof-of-  
240 concept efficacy study of 4'-FIU against zoonotic HPAs, we started treatment at the 5 mg/kg dose level  
241 12 or 24 hours after infection and continued q.d. thereafter (Fig 5e). None of the animals of either 4'-FIU

242 treatment group developed clinical signs even when treatment was initiated 24 hours after infection (Fig  
243 5f), and all treated animals survived (Fig 5g). In contrast, all vehicle-treated animals succumbed to  
244 A/VN/12/2003 (H5N1) with a median survival time of 9 days after infection, developing clinical signs on  
245 day 7 after infection followed by rapid further deterioration (Fig 5f). Vehicle-treated animals experienced  
246 high lung virus loads three days after infection (Fig 5h). Treatment reduced HPAI burden by several  
247 orders of magnitude to limit of detection. These results confirm uncompromised efficacy of 4'-FIU in  
248 high-risk immunocompromised hosts and against highly pathogenic zoonotic viruses with high  
249 pandemic concern.

### 250 **Anti-IAV immune status of 4'-FIU-treated recoveries**

251 Highly efficacious antivirals may suppress host immune activation, especially when treatment is  
252 started early in the course of infection, which may leave the host susceptible to subsequent re-infection  
253 and may potentially even result in exacerbated disease [34-36]. To explore the effect of 4'-FIU on  
254 subsequent homotypic IAV rechallenge of recoveries, we infected animals with Ca09 and started  
255 standard 3-dose 4'-FIU treatment at three time points, therapeutically at 24 and 48 hours after infection  
256 and prophylactically at 12 hours before infection (Fig 6a). For this study, mice were inoculated with  
257 aerosolized virus in a temperature and airflow-controlled aerosol chamber using an Aeronex nebulizer  
258 (S11a and S11b Figs) to better mimic natural infection. Prior to study start, we performed pilot  
259 experiments to determine suitable exposure time (S12a to S12c Figs), infectious dose (S13a and S13b  
260 Figs) and proof-of-concept for 4'-FIU efficacy (S14a to S14d Figs) after infection with aerosolized virus.  
261 Mirroring the outcome of our previous efficacy studies, animals of all treatment groups survived the  
262 original infection, whereas all animals of the vehicle group reached predefined clinical endpoints 9 days  
263 after infection and had to be terminated (Fig 6b) with major clinical signs (S15a and S15b Figs). To  
264 assess the status of humoral anti-Ca09 immunity, we collected blood samples from the treated  
265 recoverees 4, 8, and 12 weeks after the original infection and determined neutralizing antibody (nAb)  
266 titers. Mice in both therapeutic treatment groups mounted a robust humoral anti-IAV response, whereas  
267 no nAbs were detectable in the prophylactically treated animals 8 weeks after the original infection (Fig  
268 6c). Upon homotypic rechallenge with aerosolized Ca09 10 weeks after the original infection, however,

269 all 4'-FIU-experienced recoverees had a significant benefit over a new set of IAV-naïve mice (Fig 6d).  
270 All animals of the therapeutic groups survived with significant boost in nAb titers relative to week 8  
271 levels. Remarkably, four of the five animals treated prophylactically with 4'-FIU at the time of the original  
272 infection also survived the homotypic rechallenge and mounted a robust humoral anti-Ca09 response  
273 by week 12. In contrast, all newly added IAV-inexperienced animals succumbed to infection within 9  
274 days, confirming efficient virus delivery through aerosolization at rechallenge. Animals of the treatment  
275 group remained disease-free during rechallenge, and clinical signs were alleviated in mice of the  
276 prophylactic group (S15c and S15d Figs). Independent of the original 4'-FIU regimen applied, we did  
277 not detect any signs of exacerbated disease upon rechallenge of treatment-experienced recoverees.

278

## 279 **Discussion**

280 Treatment of influenza has remained challenging, despite the current availability of two different  
281 FDA-approved drug classes, the neuraminidase and endonuclease inhibitors [37]. The main challenges  
282 to more successful antiviral therapies are narrow therapeutic time windows [38], poor patient  
283 compliance [39], and impaired immunocompetence of older adults at greatest risk of advance to severe  
284 disease [17], defining key developmental objectives for the next generation of influenza therapeutics.

285 Demonstrating antiviral potency in cell culture, human airway organoids, and/or efficacy in two  
286 relevant *in vivo* infection models, ferrets and mice, this study establishes oral efficacy of 4'-FIU, a  
287 broad-spectrum antiviral ribonucleoside analog [24, 25], against seasonal, pandemic, and HPAI IAV  
288 strains. Designed to expand our first-line pharmacological arsenal against RNA viruses of pandemic  
289 concern, we have previously shown activity of 4'-FIU against SARS-CoV-2, pneumoviruses such as  
290 RSV and paramyxoviruses [24]. Mechanistic characterization consistently demonstrated that  
291 incorporation of 4'-FIU-TP into the nascent RNA strand induces polymerase chain termination [24].  
292 Unique to 4'-FIU of all chain-terminating ribonucleoside analogs analyzed [25], however, the modus of  
293 4'-FIU-induced termination varies dependent on RdRP target. IAV RdRP stalled immediately upon  
294 incorporation, RSV polymerase termination was delayed at position *i*+3 after incorporation, and SARS-  
295 CoV-2 polymerase termination was delayed and dependent on sequence context, requiring

296 incorporation of at least two 4'-FIU moieties in close repetition [24]. Delayed chain termination typically  
297 reflects that incorporation of the nucleoside analog alters secondary structure of the nascent strand,  
298 which interferes with polymerase processivity [25, 40, 41]. Accordingly, we hypothesize that distinct  
299 mechanisms of action (MOAs) against betacoronaviruses, pneumoviruses, and orthomyxoviruses are  
300 due to different capabilities of the respective polymerase complexes to accommodate 4'-FIU-specific  
301 secondary structure changes.

302 In clinical trials of baloxavir marboxil, viral resistance emerged rapidly, resulting in rebound of virus  
303 replication in 82.1% of treated patients [23]. Whole genome sequencing of 4'-FIU-experienced virus  
304 populations isolated from infected and treated animals showed no allele-dominant divergence from the  
305 inoculum population, suggesting a high genetic barrier against resistance to 4'-FIU [24]. It will  
306 nevertheless be exciting to explore whether future resistance profiling of the compound against different  
307 viral targets, including IAV, RSV, and SARS-CoV-2, is feasible and may illuminate residues that control  
308 structural flexibility of the polymerase complexes rather than substrate specificity.

309 Very likely representing a direct consequence of the distinct MOAs, however, we found influenza  
310 viruses to be most sensitive to inhibition by 4'-FIU, followed by RSV and SARS-CoV-2. Dose-finding in  
311 the mouse model identified effective levels in the low mg/kg range and three doses administered q.d. to  
312 be sufficient for achieving full therapeutic benefit, which resembled efficacy performance of baloxavir  
313 marboxil [42] and far outpaced that of the neuraminidase inhibitors [43]. Whereas therapeutic  
314 oseltamivir lacked efficacy in mice infected with pdm09 IAV isolates [44] and baloxavir marboxil  
315 ensured only partial survival when treatment was started later than 24 hours after infection [42],  
316 treatment with 4'-FIU mediated unprecedented complete survival of all treated animals when the  
317 inhibitor was first administered as late as 60 hours after infection, at the time when lung virus burden  
318 approached peak titer [45] and major clinical signs had manifested. If predictive of the treatment of  
319 human disease, this substantially widened therapeutic time window may be game-changing for  
320 influenza therapy.

321 Since clinical signs of influenza are largely a result of immunopathogenesis [46], we asked whether  
322 4'-FIU may impact the quality of the antiviral immune response and potentially trigger exacerbated

323 disease upon homotypic re-infection. Cytokine profiling showed an alleviated pro-inflammatory  
324 response in animals dosed therapeutically with 4'-FIU, but assessment of neutralizing antibody titers  
325 revealed that each of the treated animals had mounted a robust humoral response. Consistent with our  
326 previous observation of low cytotoxic and cytostatic potential of 4'-FIU [24], these results indicate that  
327 mitigated immunopathogenesis in treated animals is a consequence of reduced virus load rather than a  
328 direct immunomodulatory effect of the compound. Although essentially sterilizing, even prophylactic  
329 treatment resulted in partial protection of animals at re-infection despite the absence of neutralizing  
330 antibodies, indicating that treated animals also mounted a viable cell-mediated adaptive response [47,  
331 48].

332 Beyond individual patient benefit through mitigation of lethal infection and alleviation of viral  
333 pneumonia and lung immunopathogenesis, 4'-FIU statistically significant reduced upper respiratory  
334 tract virus load and viral shedding when treating 12 hours after infection, resulting in fully suppressed  
335 spread to untreated direct-contact sentinels in the highly sensitive ferret transmission model [49]. Later  
336 treatment initiation still reduced transmission efficiency, resulting in delayed onset of virus replication  
337 and reduced upper respiratory tract peak virus load, which serves as a biomarker for risk of progression  
338 to severe viral pneumonia [50]. If equally applicable to the human host, pharmacological block or  
339 mitigation of transmission provides a promising path towards outbreak control through efficient  
340 interruption of community transmission chains, mitigating the health threat and economic burden [51] of  
341 endemic and pandemic influenza.

342 At greatest risk of life-threatening disease are the immunocompromised [52, 53] and patients  
343 infected with zoonotic HPAI viruses [54, 55]. When assessed in an immunocompromised mouse model,  
344 baloxavir marboxil returned a significantly prolonged time to death, but ultimately all animals  
345 succumbed to the infection [56]. In contrast, treatment with 4'-FIU mediated complete survival of all  
346 animals in two distinct immunocompromised mouse models, underscoring powerful antiviral activity that  
347 does not strictly depend on a fully immunocompetent host to clear the infection [57]. Adding efficient  
348 control of highly pathogenic zoonotic IAVs, we propose that 4'-FIU meets key efficacy requirements of a  
349 next-generation antiviral clinical candidate that strengthens pandemic preparedness and provides a

350 much-needed alternative option for management of seasonal and pandemic influenza viruses.

351

## 352 **Material and Methods**

### 353 **Study design**

354 Cells, ferrets and mice were used as *in vitro*, *ex vivo* and *in vivo* models, respectively, to examine  
355 efficacy of 4'-FIU against Influenza infections. Biochemical RdRP assays were added for mechanistic  
356 characterization against the influenza virus target. Viruses were administered through intranasal or  
357 aerosolized (mice only) inoculation and virus load monitored periodically in nasal lavages (ferrets only),  
358 and in respiratory tissues of ferrets and mice extracted 4 days and 3-14 days, respectively, after  
359 infection. Virus titers were determined through TCID<sub>50</sub>-titration.

### 360 **Cells, viruses, and compound synthesis**

361 MDCK (ATCC CCL-34) and 293T (ATCC CRL-3216) cells were cultured in Dulbecco's modified  
362 Eagle's medium (DMEM) supplemented with 7.5% heat-inactivated fetal bovine serum (FBS) at 37°C  
363 and 5% CO<sub>2</sub>. Human primary cells were grown in epithelial differentiation medium [24].  
364 A/duck/Alberta/35/76 (H1N1), A/swine/Spain/53207/2004 (H1N1), A/Wisconsin/67/2005 (H3N2),  
365 A/California/07/2009 (H1N1)pdm09, A/Netherlands/602/2009 (H1N1)pdm09, A/WSN/33 (H1N1), and  
366 A/Wyoming/03/2003 (H3N2), as well as B/Brisbane/60/08 were propagated on MDCK cells using  
367 serum-free DMEM supplemented with 0.5% Trypsin. A/Viet Nam/1203/2004 (H5N1) was propagated in  
368 the allantoic cavity of embryonated hen eggs at 37°C for 24 hours, clarified, aliquoted, and stored at  
369 -80°C. The titer of A/Viet Nam/1203/2004 (H5N1) was determined by plaque assay on MCDK cells.  
370 Virus stock titers were determined through TCID<sub>50</sub>-titration, stocks were stored in aliquots at -80°C.  
371 Recombinant influenza viruses were recovered using an 8-plasmid system generated for A/CA/07/2009  
372 (H1N1) that was based on original reports for laboratory-adapted IAV [58]. Reporter viruses were  
373 generated through insertion of a nanoLuc or maxGFP-encoding ORF in frame at the 5'-end of the viral  
374 HA ORF, separated by a 2A cleavage site as described for other recombinant IAVs [59]. Genetic  
375 stability of the resulting nanoLuc-HA and maxGFP-HA segments was validated through sequence  
376 confirmation after 10 consecutive viral passages on MDCK cells. 4'-FIU was synthesized from 5'-(3-

377 chlorobenzoyloxy)-2',3'-di-O-acetyl-4'-fluorouridine and 4N ammonia in methanol as previously  
378 described [24], authenticated through elemental analysis, and stored as dry powder. Working aliquots  
379 were dissolved in DMSO or 10% methylcellulose for *in vitro* and *in vivo* studies, respectively.

### 380 **Primary human airway epithelium organoid cultures**

381 Primary HAEs ( $3 \times 10^5$ /well) at passage <3 were seeded on 6.5 mm 0.4  $\mu$ m pore size polyester  
382 inserts (Corning Costar Transwell) and differentiated for at least 21 days at air-liquid interface using Air-  
383 Liquid Interface Differentiation Medium (LifeLine Cell Technology). Transepithelial/transendothelial  
384 resistance (TEER) was monitored using an EVOM volt/ohm meter coupled with STX2 electrode (World  
385 Precision Instruments). Developing organoids were washed apically at least once per week to remove  
386 mucus. For infection virus was added apically, treatment occurred through compound addition to the  
387 basolateral chamber.

### 388 **Virus titration**

389 Virus samples were serially diluted (10-fold starting at 1:10 initial dilution) in serum-free DMEM  
390 supplemented with 0.5% Trypsin (Gibco). Serial dilutions were added to MDCK cells seeded in 96-well  
391 plate at  $1 \times 10^4$  cells per well 24 hours before infection. Infected plates were incubated for 72 hours at  
392 37°C with 5% CO<sub>2</sub>, followed by transfer of culture supernatants to suspension of chicken red blood cells  
393 and scoring of wells based on hemagglutination activity. A/Viet Nam/1203/2004 (H5N1) virus and  
394 samples were titered by plaque assay; serially diluted 10-fold in DMEM with 2% FBS, added to MDCK  
395 cells in 12-well plates and overlaid with DMEM+2% FBS with 1.2% Avicel microcrystalline cellulose.  
396 Plates were incubated for 48 hours at 37°C with 5% CO<sub>2</sub>, then washed, fixed with methanol:acetone  
397 (80:20), and counter-stained with crystal violet to visualize plaques.

### 398 **Minigenome assay**

399 293T cells were seeded and transfected with 1.0  $\mu$ g of luciferase-encoding reporter plasmid [26]  
400 and 0.5  $\mu$ g each of PB1, PB2, NP and PA expression plasmids derived from A/California/07/2009  
401 (H1N1), A/Viet Nam/1203/2004 (H5N1), and A/Anhui/1/2013 (H7N9), respectively. Three hours post  
402 transfection, 4'-FIU or vehicle (DMSO) volume equivalents were added in 3-fold serial dilution series  
403 starting at 20  $\mu$ M 4'-FIU concentration, followed by incubation for 30 hours at 37°C and determination of



404 luciferase activity using a BioTek Synergy H1 multimode plate reader. Relative activities were  
405 calculated according to the formula % relative activity =  $(RLU_i - RLU_{min}) / (RLU_{max} - RLU_{min}) \times 100$ , with  
406  $RLU_i$  specifying sample luciferase value,  $RLU_{min}$  specifying values from equally transfected, vehicle-  
407 treated cells that did not receive the PB2 subunit encoding plasmid, and  $RLU_{max}$  specifying values from  
408 fully transfected, vehicle-treated cells.

#### 409 **Dose-response assays**

410 Active concentrations ( $EC_{50}$  and  $EC_{90}$ ) of 4'-FIU were calculated through 4-parameter variable  
411 slope regression modeling of dose-response assay data, derived from minigenome assays, luciferase  
412 reporter virus assays, or progeny virus yield ( $TCID_{50}$ ) assays as specified. Test article was in all cases  
413 assessed in 3-fold serial dilutions.

#### 414 **Recombinant IAV RdRP expression and purification**

415 A/CA/07/2009 (H1N1)-derived PA, PB1, and PB2 expression plasmids were subcloned into the  
416 pFastbac Dual plasmid expression vector (Invitrogen) with polyhedrin promoter control. An TEV  
417 protease-cleavable N-terminal hexahistidine-tag was added to the PA subunit to facilitate purification of  
418 the complex through affinity chromatography. The individual plasmids were transformed in DH10bac  
419 cells and the resulting bacmid transfected into SF9 cells. After virus recovery, SF9 cells were infected  
420 with the three individual viruses in the ratio of 1:1:2. Cells were harvested after 72 hours and lysed in  
421 lysis buffer (Tris 50 mM pH 7.4, NaCl 300 mM, NP 40 0.5%, protease inhibitor cocktail, glycerol 10%,  
422 TCEP 0.5 mM) on ice for two hours, followed by sonication. Clarified supernatant was incubated at 4°C  
423 for 1 hour with Ni-NTA beads which were pre-equilibrated with Tris 50 mM pH 7.4, NaCl 300 mM, NP  
424 40 0.2%, glycerol 10%, TCEP 0.5 mM containing 20 mM imidazole. After extensive washing with Tris  
425 50 mM pH 7.4, NaCl 300 mM, NP 40 0.2%, glycerol 10%, TCEP 0.5 mM containing 20-50 mM  
426 imidazole, protein complexes were eluted in buffer Tris 50 mM pH 7.4, NaCl 300 mM, NP 40 0.2%,  
427 glycerol 10%, TCEP 0.5 mM containing 250 mM imidazole. Eluted protein fractions were pooled and  
428 loaded on heparin HP columns, which were flushed with buffer A (Tris 50 mM pH 7.4, NaCl 250 mM,  
429 glycerol 10%), then 0-100% of buffer B (Tris 50 mM pH 7.4, NaCl 1M, glycerol 10%) diluted in buffer A.  
430 The polymerase complex peak was observed in ~80% buffer B, which corresponds to approximately

431 900 mM NaCl in the buffer. Peak fractions were collected separately and dialyzed against buffer C  
432 (Tris/Cl 50 mM pH 7.4, NaCl 150 mM, glycerol 10%) in dialyzing cassettes at 4°C overnight. Purified  
433 protein complexes were harvested, aliquoted and stored at -80°C until use.

#### 434 ***In vitro* RdRP primer extension assay**

435 *In vitro* primer extension assays were carried out essentially as described [24, 60]. Briefly, RdRP  
436 assay reactions were set up in 20 mM Tris-HCl pH 7.4, 10% glycerol, 1 mM TCEP, 3 mM MnCl<sub>2</sub>, 2 μM  
437 RNA template, 100 μM RNA primer, and nucleotides and 1 μCi of α<sup>32</sup>P-labelled ATP (Perkin-Elmer) as  
438 specified in the figure legends, followed by incubation at 30°C for 10 minutes. Polymerase complexes  
439 were added to the reaction and incubation continued for 1 hour at 30°C. Reactions were stopped with 1  
440 volume of deionized formamide containing 25 mM ethylenediaminetetraacetic acid (EDTA), followed by  
441 a denaturation step at 95°C. Amplicons were fractionated on 20% polyacrylamide gels with 7M urea,  
442 using a Tris-Borate-EDTA electrophoresis buffer. Amplicons were visualized by autoradiography, using  
443 a storage phosphor screen BAS IP MS 2040 E (GE Healthcare Life Sciences) and Typhoon FLA 7000  
444 (GE Healthcare Life Sciences) imager. Densitometry analysis was performed using FIJI 2.1.0. To  
445 determine enzyme kinetics ( $V_{max}$  and  $K_m$ ), Michaelis-Menten equation was applied in Prism 9.0.0  
446 (GraphPad).

#### 447 **Pharmacokinetic property and tissue distribution profiling in mice**

448 Male and female C57BL/6J mice were rested for 3 days prior to study start. Then, animals were  
449 gavaged with 1.5 mg/kg bodyweight 4'-FIU in 10 mM sodium citrate with 0.5% Tween 80, final gavage  
450 volume 200 μl. Blood samples (150 μl) were taken at 90 minutes, 3 hours and 12 hours after dosing,  
451 cleared (2,000 rpm, 5 minutes, 4°C), and extracted plasma stored at -80°C. Organ samples (lung,  
452 brain, spleen, heart, kidney and liver) were harvested 12 hours after dosing and snap-frozen in liquid  
453 nitrogen. Animal tissues were homogenized with 70% acetonitrile in water that included internal  
454 standards. Animal plasma and tissue concentrations of 4'-FIU and 4'-FIU-TP were measured by a  
455 qualified LC/MS/MS method in MRM mode on a QTRAP 5500 (Sciex, Santa Clara, CA, USA)  
456 instrument.

#### 457 **Intranasal infection of mice**

458 Female or male mice (5-8 weeks of age, Balb/c, RAG1 KO or IFNar KO) were purchased from  
459 Jackson Laboratories. Upon arrival, mice were rested for at least 3 days, then randomly assigned to  
460 study groups and housed under ABSL-2 or ABSL-3 conditions for infections with A/CA/07/2009 (H1N1)  
461 recombinants or A/VN12/2003 (H5N1), respectively. Bodyweight was determined twice daily, body  
462 temperature determined once daily rectally. For infections, animals were anesthetized with isoflurane or  
463 isoflurane/ketamine (H5N1 challenge only), followed by intranasal inoculation with  $2.5 \times 10^1$  TCID<sub>50</sub>  
464 units/animal of A/CA/07/2009 (H1N1),  $1 \times 10^3$ -  $1 \times 10^5$  TCID<sub>50</sub> units/animal of GFP or nanoLuc expressing  
465 reporter virus versions of A/CA/07/2009 (H1N1), or  $6 \times 10^1$  of A/VN12/2003 (H5N1). In all cases, virus  
466 inoculum was diluted in 50  $\mu$ l and administered in amounts of 25  $\mu$ l per nare. Animals were euthanized  
467 and organs harvested at predefined time points or when animals reached humane study endpoints.

#### 468 **4'-FIU anti-IAV efficacy studies in mice**

469 Mice were inoculated intranasally with IAV stocks as described, followed by treatment with 4'-FIU  
470 at specified dose levels and starting time points through oral gavage. Unless specified otherwise,  
471 treatment was continued q.d. Each individual study contained animals receiving equal volumes of  
472 vehicle through oral gavage. At study end point, lung tissue was harvested for virus titration or  
473 histopathology assessment. For tissue fixation, lungs were perfused using 10% neutral-buffered  
474 formalin [10% formalin, NaH<sub>2</sub>PO<sub>4</sub> (4 g/liter), and Na<sub>2</sub>HPO<sub>4</sub> (6.5 g/liter)], dissected, and fixed for 24  
475 hours. Formalin-fixed lungs were transferred to 70% EtOH after 72 hours, embedded in paraffin,  
476 sectioned (5- $\mu$ m thickness), and stained with hematoxylin and eosin. Slides were evaluated by a  
477 licensed pathologist. A pathology score range of 0 to 3 was used to evaluate tissue damage. For  
478 analysis of proinflammatory cytokine levels through Bioplex, lungs of euthanized mice were lavaged  
479 with 1 ml sterile PBS to extract BALFs, and cleared BALF analyzed against the Standard Th17-panel  
480 (Bio-Rad) according to the manufacturer's instructions.

#### 481 **Efficacy studies in ferrets**

482 Female ferrets (6-10 months of age) were purchased from Triple F Farms. Upon arrival, ferrets  
483 were rested for 1 week, then randomly assigned to study groups and housed in groups of three animals  
484 under ABSL-2 conditions. In some studies, animals received a temperature sensor for continued

485 telemetric measurement of body temperature. Otherwise, body temperature was determined rectally  
486 once daily. Dexmedetomidine/ketamine anesthetized animals were inoculated intranasally with  $1 \times 10^5$   
487 TCID<sub>50</sub> units of A/CA/07/2009 (H1N1) in a volume of 300  $\mu$ l per nare. Nasal lavages were performed  
488 twice daily using 1 ml of PBS containing 2 $\times$  antibiotics-antimycotics (Gibco). Treatment with 4'-FIU  
489 through oral gavage followed a q.d. regimen. Ferrets were terminated four days post infection and  
490 BALF and organ (lungs, turbinates and tracheas) samples extracted for virus titrations.

#### 491 **Ferret transmission studies**

492 Female ferrets (3-8 months of age) were anesthetized with dexmedetomidine/ketamine and  
493 infected intranasally with  $1 \times 10^5$  TCID<sub>50</sub> units of A/CA/07/2009 (H1N1) as before. Nasal lavages were  
494 performed every 12 hours, bodyweight and temperature determined once daily. Treatment of source  
495 animals was initiated 12 or 24 hours after infection at a dose of 2mg/kg bodyweight, and continued q.d.  
496 for three doses total. Starting day 2.5 after infection, uninfected and untreated contact animals were  
497 added to the infected and treated source ferrets to allow direct-contact transmission, and co-housing  
498 continued until termination of the source ferrets on study day 4. Sentinels were subjected to once daily  
499 nasal lavages and monitored until study day 10 or, when infectious particles were detected in lavages  
500 of contacts of 4'-FIU-treated source animals, study day 14.

#### 501 **Virus titration from tissue samples**

502 Organs were weighed and homogenized in 500  $\mu$ l PBS using a beat blaster, set to 3 cycles of 30  
503 seconds each at 4°C, separated by 1-minute rest periods. Homogenates were cleared (10 minutes at  
504 20,000  $\times$  g and 4°C), and cleared supernatants stored at -80°C until virus titration. Viral titers were  
505 expressed as TCID<sub>50</sub> units per gram input tissue. For A/VN12/2003 (H5N1), lungs were homogenized  
506 using a TissueLyzer (Qiagen), clarified by centrifugation, supernatants aliquoted, and then stored at -  
507 80°C. A/VN12/2003 (H5N1) virus titer was determined by plaque assay and expressed as PFU per ml  
508 of lung homogenate.

#### 509 **Infection of mice with aerosolized A/CA/07/2009 (H1N1)**

510 An Aeroneb (Kent Scientific) system was used to infect mice (female Balb/c, 6-8 weeks of age)  
511 with aerosolized IAV. Conscious animals were transferred to an aerosol chamber placed on a heat pad

512 adjusted to 37°C to prevent condensation, connected to the nebulizer unit (Aeroneb with palladium  
513 mesh) and air pump with airflow restrictor. For condition-finding experiments, the nebulizer chamber  
514 was loaded with virus inoculum diluted to  $1 \times 10^3$ - $1 \times 10^5$  TCID<sub>50</sub> A/CA/07/2009 (H1N1) per ml in sterile  
515 PBS, airflow adjusted to 1 l/minute, and animals continuously exposed for 3, 10, or 30 minutes. For  
516 treatment studies, conditions were adjusted to  $1 \times 10^5$  TCID<sub>50</sub>/ml in sterile PBS, 10 minutes exposure  
517 time, and 1 l/minute airflow.

#### 518 **Re-infection of 4'-FIU-experienced mice with A/CA/07/2009 (H1N1)**

519 Mice infected with aerosolized A/CA/07/2009 (H1N1) as above were treated q.d. with 4'-FIU or  
520 vehicle as specified, and monitored for 10 weeks or until humane endpoints were reached. Blood was  
521 collected 4 and 8 weeks after infection and A/CA/07/2009 (H1N1)-neutralizing antibody titers  
522 determined. Treated recoverees were reinfected with homotypic, aerosolized A/CA/07/2009 (H1N1) 10  
523 weeks after the original infection along with a fresh set of naïve animals, followed by monitoring for an  
524 additional 14 days and final blood collection at study end. No treatment was administered after  
525 reinfection.

#### 526 **Neutralizing antibody titers in mice**

527 Plasma was prepared from blood samples (2,000 rpm, 10 minutes, 4°C and stored at -80°C until  
528 analysis. Heat-inactivated plasma was incubated with 100 TCID<sub>50</sub> units of A/CA/07/2009 (H1N1)  
529 (H1N1) for 90 minutes, followed by serial dilution and transfer to MDCK cells, and plates incubated for 3  
530 days at 37°C. Remaining infectivity was visualized through hemagglutination activity on chicken red  
531 blood cells.

#### 532 **Statistical analysis**

533 For statistical analysis of studies consisting of only two groups, unpaired two-tailed t-tests were  
534 applied. When comparing more than two study groups, 1-way analysis of variance (ANOVA) or 2-way  
535 ANOVA with multiple comparison *post hoc* tests as specified were used to assess statistical difference  
536 between samples. Statistical analyses were carried out in Prism version 9.4.1 (GraphPad). The number  
537 of individual biological replicates (n values) and exact P values are shown in the figures when possible.  
538 The threshold of statistical significance ( $\alpha$ ) was set to 0.05. Source data and statistical analysis are

539 shown in S1 and S2 Data files, respectively.

#### 540 **Ethical compliance**

541 All animal work was performed in compliance with the *Guide for the Care and Use of Laboratory*  
542 *Animals* of the National Institutes of Health and the Animal Welfare Act Code of Federal Regulations.  
543 Experiments involving mice and ferrets were approved by the Georgia State University Institutional  
544 Animal Care and Use Committee (IACUC) under protocols A20012 and A21020, respectively. *In vivo*  
545 experimentation with HPAI viruses was approved by the University of Georgia at Athens IACUC under  
546 protocol A2020 03-033. All experiments using infectious material were approved by the Georgia State  
547 University and the University of Georgia at Athens Institutional Biosafety Committees (IBCs) and  
548 performed in BSL-2/ABSL-2 or BSL-3/ABSL-3 containment facilities, respectively. Experiments  
549 involving HPAI were reviewed and approved by the IBC of the University of Georgia at Athens and  
550 were conducted in enhanced biosafety level 3 (BSL3+) containment according to guidelines for the use  
551 of select agents approved by the CDC.

552

#### 553 **Acknowledgements**

554 We thank AC Lowen for IAV and IBV virus isolates and the Georgia State University Department of  
555 Animal Resources for Assistance.

556

#### 557 **Competing Interests**

558 MGN and GRP are coinventors on patent WO 2019/1736002 covering composition of matter and use of  
559 4'-FIU (EIDD-2749) and its analogs as an antiviral treatment. This study could affect their personal  
560 financial status. RKP reports contract testing from Enanta Pharmaceuticals and Atea Pharmaceuticals,  
561 and research support from Gilead Sciences, outside of the described work. All other authors declare  
562 that they have no competing interests.

563

#### 564 **References**

565 1. Greenwood M. The Epidemiology of Influenza. *Br Med J.* 1918;2(3021):563-6. Epub 1918/11/23.  
566 doi: 10.1136/bmj.2.3021.563. PubMed PMID: 20769264; PubMed Central PMCID: PMCPMC2342100.

- 567 2. Sendor AB, Weerasuriya D, Sapra A. Avian Influenza. StatPearls. Treasure Island (FL):  
568 StatPearls Publishing Copyright © 2022, StatPearls Publishing LLC.; 2022.
- 569 3. Christie Wilcox TS. Unprecedented Avian Flu Epidemic Could Presage Year-Round Outbreaks  
570 2022. Available from: [https://www.the-scientist.com/news-opinion/unprecedented-avian-flu-epidemic-could-presage-year-round-outbreaks-70584?utm\\_campaign=TS\\_DAILY\\_NEWSLETTER\\_2022&utm\\_medium=email&\\_hsmi=228465931&\\_hsenc=p2ANqtz-8TgW7-yAeXmDwdZXM5FZG2PFR9rD1ZgiLLf7s9vbRNouK\\_QcXXckHpbv606nJ0vnXWU8KCDXHcq6xrTI8qoiSj6M0XPA&utm\\_content=228465931&utm\\_source=hs\\_email](https://www.the-scientist.com/news-opinion/unprecedented-avian-flu-epidemic-could-presage-year-round-outbreaks-70584?utm_campaign=TS_DAILY_NEWSLETTER_2022&utm_medium=email&_hsmi=228465931&_hsenc=p2ANqtz-8TgW7-yAeXmDwdZXM5FZG2PFR9rD1ZgiLLf7s9vbRNouK_QcXXckHpbv606nJ0vnXWU8KCDXHcq6xrTI8qoiSj6M0XPA&utm_content=228465931&utm_source=hs_email).  
571  
572  
573  
574  
575
- 576 4. ECDC. 2021-2022 data show largest avian flu epidemic in Europe ever, last exceeded  
577 10/21/2022: European Centre for Disease Prevention and Control; 2022. Available from:  
578 [https://www.ecdc.europa.eu/en/news-events/2021-2022-data-show-largest-avian-flu-epidemic-europe-](https://www.ecdc.europa.eu/en/news-events/2021-2022-data-show-largest-avian-flu-epidemic-europe-ever)  
579 [ever](https://www.ecdc.europa.eu/en/news-events/2021-2022-data-show-largest-avian-flu-epidemic-europe-ever).
- 580 5. Morens DM, Taubenberger JK. Pandemic influenza: certain uncertainties. *Rev Med Virol.*  
581 2011;21(5):262-84. Epub 20110627. doi: 10.1002/rmv.689. PubMed PMID: 21706672; PubMed Central  
582 PMCID: PMCPMC3246071.
- 583 6. CDC. History of 1918 Flu Pandemic, last accessed 10/07/2022: Centers for Disease Control and  
584 Prevention; 2018. Available from: [https://www.cdc.gov/flu/pandemic-resources/1918-](https://www.cdc.gov/flu/pandemic-resources/1918-commemoration/1918-pandemic-history.htm)  
585 [commemoration/1918-pandemic-history.htm](https://www.cdc.gov/flu/pandemic-resources/1918-commemoration/1918-pandemic-history.htm).
- 586 7. Taubenberger JK, Kash JC, Morens DM. The 1918 influenza pandemic: 100 years of questions  
587 answered and unanswered. *Sci Transl Med.* 2019;11(502). Epub 2019/07/26. doi:  
588 10.1126/scitranslmed.aau5485. PubMed PMID: 31341062.
- 589 8. Cheung JTL, Lau EH, Jin Z, Zhu H, Guan Y, Peiris M. Influenza A virus transmission in swine  
590 farms and during transport in the swine supply chain. *Transbound Emerg Dis.* 2022;69(5):e3101-e10.  
591 Epub 2022/07/27. doi: 10.1111/tbed.14667. PubMed PMID: 35881331.
- 592 9. CDC. 2009 H1N1 Pandemic (H1N1pdm09 virus), last accessed 10/07/2022: Centers for Disease  
593 Control and Prevention; 2019. Available from: [https://www.cdc.gov/flu/pandemic-resources/2009-h1n1-](https://www.cdc.gov/flu/pandemic-resources/2009-h1n1-pandemic.html)  
594 [pandemic.html](https://www.cdc.gov/flu/pandemic-resources/2009-h1n1-pandemic.html).
- 595 10. Yang JH, Huang PY, Shie SS, Yang S, Tsao KC, Wu TL, et al. Predictive Symptoms and Signs  
596 of Laboratory-confirmed Influenza: A Prospective Surveillance Study of Two Metropolitan Areas in  
597 Taiwan. *Medicine (Baltimore).* 2015;94(44):e1952. Epub 2015/11/12. doi:  
598 10.1097/md.0000000000001952. PubMed PMID: 26554802; PubMed Central PMCID:  
599 PMCPMC4915903.
- 600 11. Florescu DF, Kalil AC. The complex link between influenza and severe sepsis. *Virulence.*  
601 2014;5(1):137-42. Epub 2013/11/21. doi: 10.4161/viru.27103. PubMed PMID: 24253109; PubMed  
602 Central PMCID: PMCPMC3916367.
- 603 12. Kido H, Chida J, Yao M, Wang S. [Mechanisms of multi-organ failure in severe influenza]. *Nihon*  
604 *Rinsho.* 2010;68(8):1565-73. Epub 2010/08/19. PubMed PMID: 20715496.
- 605 13. Radovanovic M, Petrovic M, Barsoum MK, Nordstrom CW, Calvin AD, Dumic I, et al. Influenza  
606 Myopericarditis and Pericarditis: A Literature Review. *J Clin Med.* 2022;11(14). Epub 2022/07/28. doi:  
607 10.3390/jcm11144123. PubMed PMID: 35887887; PubMed Central PMCID: PMCPMC9316162.
- 608 14. Vousden N, Knight M. Lessons learned from the A (H1N1) influenza pandemic. *Best Pract Res*  
609 *Clin Obstet Gynaecol.* 2021;76:41-52. Epub 2020/11/05. doi: 10.1016/j.bpobgyn.2020.08.006. PubMed  
610 PMID: 33144076; PubMed Central PMCID: PMCPMC7550184.
- 611 15. CDC. Vaccine Effectiveness: How Well Do Flu Vaccines Work?, last accessed 10/05/2022:  
612 Centers for Disease Control and Prevention; 2022. Available from: [https://www.cdc.gov/flu/vaccines-](https://www.cdc.gov/flu/vaccines-work/vaccineeffect.htm)  
613 [work/vaccineeffect.htm](https://www.cdc.gov/flu/vaccines-work/vaccineeffect.htm).
- 614 16. Pleguezuelos O, James E, Fernandez A, Lopes V, Rosas LA, Cervantes-Medina A, et al. Efficacy  
615 of FLU-v, a broad-spectrum influenza vaccine, in a randomized phase IIb human influenza challenge  
616 study. *NPJ Vaccines.* 2020;5(1):22. Epub 2020/03/21. doi: 10.1038/s41541-020-0174-9. PubMed PMID:  
617 32194999; PubMed Central PMCID: PMCPMC7069936.
- 618 17. CDC. Influenza Antiviral Medications: Summary for Clinicians, last accessed 10/05/2022: Centers  
619 for Disease Control and Prevention; 2022. Available from:  
620 <https://www.cdc.gov/flu/professionals/antivirals/summary-clinicians.htm>.

- 621 18. Nelson MI, Simonsen L, Viboud C, Miller MA, Holmes EC. The origin and global emergence of  
622 adamantane resistant A/H3N2 influenza viruses. *Virology*. 2009;388(2):270-8. Epub 2009/04/28. doi:  
623 10.1016/j.virol.2009.03.026. PubMed PMID: 19394063; PubMed Central PMCID: PMCPMC2705899.
- 624 19. Hussain M, Galvin HD, Haw TY, Nutsford AN, Husain M. Drug resistance in influenza A virus: the  
625 epidemiology and management. *Infect Drug Resist*. 2017;10:121-34. Epub 2017/05/02. doi:  
626 10.2147/idr.S105473. PubMed PMID: 28458567; PubMed Central PMCID: PMCPMC5404498.
- 627 20. CDC. Antiviral Drug Resistance among Influenza Viruses, last accessed 10/07/2022: Centers for  
628 Disease Control and Prevention; 2016. Available from:  
629 <https://www.cdc.gov/flu/professionals/antivirals/antiviral-drug-resistance.htm>.
- 630 21. Patel MC, Mishin VP, De La Cruz JA, Chesnokov A, Nguyen HT, Wilson MM, et al. Detection of  
631 baloxavir resistant influenza A viruses using next generation sequencing and pyrosequencing methods.  
632 *Antiviral Res*. 2020;182:104906. Epub 2020/08/18. doi: 10.1016/j.antiviral.2020.104906. PubMed PMID:  
633 32798601; PubMed Central PMCID: PMCPMC7426223.
- 634 22. CDC. Influenza Antiviral Drug Baloxavir Marboxil, last accessed 10/03/2022: Centers for Disease  
635 Control and Prevention; 2022. Available from: <https://www.cdc.gov/flu/treatment/baloxavir-marboxil.htm>.
- 636 23. Ince WL, Smith FB, O'Rear JJ, Thomson M. Treatment-Emergent Influenza Virus Polymerase  
637 Acidic Substitutions Independent of Those at I38 Associated With Reduced Baloxavir Susceptibility and  
638 Virus Rebound in Trials of Baloxavir Marboxil. *J Infect Dis*. 2020;222(6):957-61. Epub 2020/04/08. doi:  
639 10.1093/infdis/jiaa164. PubMed PMID: 32253432.
- 640 24. Sourimant J, Lieber CM, Aggarwal M, Cox RM, Wolf JD, Yoon JJ, et al. 4'-Fluorouridine is an oral  
641 antiviral that blocks respiratory syncytial virus and SARS-CoV-2 replication. *Science*.  
642 2022;375(6577):161-7. Epub 2021/12/03. doi: 10.1126/science.abj5508. PubMed PMID: 34855509.
- 643 25. Lieber CM, Plemper RK. 4'-Fluorouridine Is a Broad-Spectrum Orally Available First-Line Antiviral  
644 That May Improve Pandemic Preparedness. *DNA Cell Biol*. 2022;41(8):699-704. Epub 20220705. doi:  
645 10.1089/dna.2022.0312. PubMed PMID: 35788144; PubMed Central PMCID: PMCPMC9416544.
- 646 26. Yan D, Weisshaar M, Lamb K, Chung HK, Lin MZ, Plemper RK. Replication-Competent Influenza  
647 Virus and Respiratory Syncytial Virus Luciferase Reporter Strains Engineered for Co-Infections Identify  
648 Antiviral Compounds in Combination Screens. *Biochemistry*. 2015;54(36):5589-604. Epub 2015/08/27.  
649 doi: 10.1021/acs.biochem.5b00623. PubMed PMID: 26307636; PubMed Central PMCID:  
650 PMCPMC4719150.
- 651 27. Kiseleva I, Rekstin A, Al Farroukh M, Bazhenova E, Katelnikova A, Puchkova L, et al. Non-Mouse-  
652 Adapted H1N1pdm09 Virus as a Model for Influenza Research. *Viruses*. 2020;12(6). Epub 2020/06/04.  
653 doi: 10.3390/v12060590. PubMed PMID: 32485821; PubMed Central PMCID: PMCPMC7354452.
- 654 28. Hayden FG. Prevention and treatment of influenza in immunocompromised patients. *Am J Med*.  
655 1997;102(3A):55-60; discussion 75-6. Epub 1997/03/17. PubMed PMID: 10868144.
- 656 29. Kunisaki KM, Janoff EN. Influenza in immunosuppressed populations: a review of infection  
657 frequency, morbidity, mortality, and vaccine responses. *Lancet Infect Dis*. 2009;9(8):493-504. Epub  
658 2009/07/25. doi: 10.1016/s1473-3099(09)70175-6. PubMed PMID: 19628174; PubMed Central PMCID:  
659 PMCPMC2775097.
- 660 30. Arimori Y, Nakamura R, Yamada H, Shibata K, Maeda N, Kase T, et al. Type I interferon limits  
661 influenza virus-induced acute lung injury by regulation of excessive inflammation in mice. *Antiviral Res*.  
662 2013;99(3):230-7. Epub 2013/06/01. doi: 10.1016/j.antiviral.2013.05.007. PubMed PMID: 23721943.
- 663 31. Jackson. B6(Cg)-Ifnar1tm1.2Ees/J, last accessed 10/08/2022: The Jackson Laboratory; 2022.  
664 Available from: <https://www.jax.org/strain/028288>.
- 665 32. Jackson. B6.129S7-Rag1tm1Mom/J, last accessed 10/08/2022: The Jackson Laboratory; 2022.  
666 Available from: <https://www.jax.org/strain/002216>.
- 667 33. Bissel SJ, Giles BM, Wang G, Olevian DC, Ross TM, Wiley CA. Acute murine H5N1 influenza A  
668 encephalitis. *Brain Pathol*. 2012;22(2):150-8. Epub 2011/07/01. doi: 10.1111/j.1750-3639.2011.00514.x.  
669 PubMed PMID: 21714828; PubMed Central PMCID: PMCPMC3204170.
- 670 34. Sonoguchi T, Sakoh M, Kunita N, Satsuta K, Noriki H, Fukumi H. Reinfection with influenza A  
671 (H2N2, H3N2, and H1N1) viruses in soldiers and students in Japan. *J Infect Dis*. 1986;153(1):33-40.  
672 Epub 1986/01/01. doi: 10.1093/infdis/153.1.33. PubMed PMID: 3941288.
- 673 35. Memoli MJ, Han A, Walters KA, Czajkowski L, Reed S, Athota R, et al. Influenza A Reinfection in  
674 Sequential Human Challenge: Implications for Protective Immunity and "Universal" Vaccine



- 675 Development. *Clin Infect Dis*. 2020;70(5):748-53. Epub 2019/04/07. doi: 10.1093/cid/ciz281. PubMed  
676 PMID: 30953061; PubMed Central PMCID: PMC7319262.
- 677 36. CDC. Background and Guidance on the Use of Influenza Antiviral Agents, last accessed  
678 10/07/2022: Centers for Disease Control and Prevention; 2016. Available from:  
679 <https://www.cdc.gov/flu/professionals/antivirals/antiviral-use-influenza.htm>.
- 680 37. FDA. Influenza (Flu) Antiviral Drugs and Related Information, last accessed 10/03/2022: U.S.  
681 Food and Drug Administration; 2020. Available from: <https://www.fda.gov/drugs/information-drug-class/influenza-flu-antiviral-drugs-and-related-information>.
- 682 38. Xiao X, Wang C, Chang D, Wang Y, Dong X, Jiao T, et al. Identification of Potent and Safe  
683 Antiviral Therapeutic Candidates Against SARS-CoV-2. *Front Immunol*. 2020;11:586572. Epub  
684 2020/12/17. doi: 10.3389/fimmu.2020.586572. PubMed PMID: 33324406; PubMed Central PMCID:  
685 PMC7723961.
- 686 39. Smith LE, D'Antoni D, Jain V, Pearce JM, Weinman J, Rubin GJ. A systematic review of factors  
687 affecting intended and actual adherence with antiviral medication as treatment or prophylaxis in seasonal  
688 and pandemic flu. *Influenza Other Respir Viruses*. 2016;10(6):462-78. Epub 2016/07/12. doi:  
689 10.1111/irv.12406. PubMed PMID: 27397480; PubMed Central PMCID: PMC5059947.
- 690 40. Tchesnokov EP, Obikhod A, Schinazi RF, Götte M. Delayed chain termination protects the anti-  
691 hepatitis B virus drug entecavir from excision by HIV-1 reverse transcriptase. *J Biol Chem*.  
692 2008;283(49):34218-28. Epub 2008/10/23. doi: 10.1074/jbc.M806797200. PubMed PMID: 18940786;  
693 PubMed Central PMCID: PMC2590697.
- 694 41. Kokic G, Hillen HS, Tegunov D, Dienemann C, Seitz F, Schmitzova J, et al. Mechanism of SARS-  
695 CoV-2 polymerase stalling by remdesivir. *Nat Commun*. 2021;12(1):279. Epub 2021/01/14. doi:  
696 10.1038/s41467-020-20542-0. PubMed PMID: 33436624; PubMed Central PMCID: PMC7804290.
- 697 42. Fukao K, Ando Y, Noshi T, Kitano M, Noda T, Kawai M, et al. Baloxavir marboxil, a novel cap-  
698 dependent endonuclease inhibitor potently suppresses influenza virus replication and represents  
699 therapeutic effects in both immunocompetent and immunocompromised mouse models. *PLoS One*.  
700 2019;14(5):e0217307. Epub 2019/05/21. doi: 10.1371/journal.pone.0217307. PubMed PMID: 31107922;  
701 PubMed Central PMCID: PMC6527232 Research, Co., Ltd, an affiliation of Shionogi. This does not  
702 alter our adherence to PLOS ONE policies on sharing data and materials.
- 703 43. Wong ZX, Jones JE, Anderson GP, Gualano RC. Oseltamivir treatment of mice before or after  
704 mild influenza infection reduced cellular and cytokine inflammation in the lung. *Influenza Other Respir*  
705 *Viruses*. 2011;5(5):343-50. Epub 2011/06/15. doi: 10.1111/j.1750-2659.2011.00235.x. PubMed PMID:  
706 21668689; PubMed Central PMCID: PMC4942046.
- 707 44. Pizzorno A, Abed Y, Rhéaume C, Boivin G. Oseltamivir-zanamivir combination therapy is not  
708 superior to zanamivir monotherapy in mice infected with influenza A(H3N2) and A(H1N1)pdm09 viruses.  
709 *Antiviral Res*. 2014;105:54-8. Epub 2014/03/04. doi: 10.1016/j.antiviral.2014.02.017. PubMed PMID:  
710 24583158.
- 711 45. Garigliany MM, Habyarimana A, Lambrecht B, Van de Paar E, Cornet A, van den Berg T, et al.  
712 Influenza A strain-dependent pathogenesis in fatal H1N1 and H5N1 subtype infections of mice. *Emerg*  
713 *Infect Dis*. 2010;16(4):595-603. Epub 2010/03/31. doi: 10.3201/eid1604.091061. PubMed PMID:  
714 20350372; PubMed Central PMCID: PMC3321946.
- 715 46. Gounder AP, Boon ACM. Influenza Pathogenesis: The Effect of Host Factors on Severity of  
716 Disease. *J Immunol*. 2019;202(2):341-50. Epub 2019/01/09. doi: 10.4049/jimmunol.1801010. PubMed  
717 PMID: 30617115; PubMed Central PMCID: PMC6327976.
- 718 47. Iwasaki A, Medzhitov R. Control of adaptive immunity by the innate immune system. *Nat Immunol*.  
719 2015;16(4):343-53. Epub 2015/03/20. doi: 10.1038/ni.3123. PubMed PMID: 25789684; PubMed Central  
720 PMCID: PMC4507498.
- 721 48. Chern YJ, Tai IT. Adaptive response of resistant cancer cells to chemotherapy. *Cancer Biol Med*.  
722 2020;17(4):842-63. Epub 2020/12/11. doi: 10.20892/j.issn.2095-3941.2020.0005. PubMed PMID:  
723 33299639; PubMed Central PMCID: PMC7721100.
- 724 49. Stannard HL, Mifsud EJ, Wildum S, Brown SK, Koszalka P, Shishido T, et al. Assessing the fitness  
725 of a dual-antiviral drug resistant human influenza virus in the ferret model. *Commun Biol*. 2022;5(1):1026.  
726 Epub 2022/09/29. doi: 10.1038/s42003-022-04005-4. PubMed PMID: 36171475; PubMed Central  
727

- 728 PMCID: PMCPMC9517990 employees of F. Hoffmann-La Roche. All other authors declare no competing  
729 interests.
- 730 50. Lee N, Chan PK, Hui DS, Rainer TH, Wong E, Choi KW, et al. Viral loads and duration of viral  
731 shedding in adult patients hospitalized with influenza. *J Infect Dis.* 2009;200(4):492-500. Epub  
732 2009/07/14. doi: 10.1086/600383. PubMed PMID: 19591575; PubMed Central PMCID:  
733 PMCPMC7110250.
- 734 51. de Courville C, Cadarette SM, Wissinger E, Alvarez FP. The economic burden of influenza among  
735 adults aged 18 to 64: A systematic literature review. *Influenza Other Respir Viruses.* 2022;16(3):376-85.  
736 Epub 2022/02/06. doi: 10.1111/irv.12963. PubMed PMID: 35122389; PubMed Central PMCID:  
737 PMCPMC8983919.
- 738 52. Health WSDo. Are you at high risk for flu?, last accessed 10/08/2022. 2022.
- 739 53. CDC. Flu Symptoms & Complications, last accessed 10/06/2022. 2022.
- 740 54. CDC. HPAI A H5 Virus Background and Clinical Illness, last accessed 10/07/2022. 2015.
- 741 55. ECDC. Facts about avian influenza in humans, last accessed 10/10/2022: European Centre for  
742 Disease Prevention and Control; 2022. Available from: [https://www.ecdc.europa.eu/en/avian-influenza-](https://www.ecdc.europa.eu/en/avian-influenza-humans/facts)  
743 [humans/facts](https://www.ecdc.europa.eu/en/avian-influenza-humans/facts).
- 744 56. Kiso M, Yamayoshi S, Murakami J, Kawaoka Y. Baloxavir Marboxil Treatment of Nude Mice  
745 Infected With Influenza A Virus. *J Infect Dis.* 2020;221(10):1699-702. Epub 2019/12/15. doi:  
746 10.1093/infdis/jiz665. PubMed PMID: 31837268; PubMed Central PMCID: PMCPMC7184910.
- 747 57. Kimura K, Adlakha A, Simon PM. Fatal case of swine influenza virus in an immunocompetent  
748 host. *Mayo Clin Proc.* 1998;73(3):243-5. Epub 1998/03/25. doi: 10.4065/73.3.243. PubMed PMID:  
749 9511782.
- 750 58. Neumann G, Watanabe T, Ito H, Watanabe S, Goto H, Gao P, et al. Generation of influenza A  
751 viruses entirely from cloned cDNAs. *Proc Natl Acad Sci U S A.* 1999;96(16):9345-50. Epub 1999/08/04.  
752 PubMed PMID: 10430945; PubMed Central PMCID: PMC17785.
- 753 59. Nogales A, Ávila-Pérez G, Rangel-Moreno J, Chiem K, DeDiego ML, Martínez-Sobrido L. A Novel  
754 Fluorescent and Bioluminescent Bireporter Influenza A Virus To Evaluate Viral Infections. *J Virol.*  
755 2019;93(10). Epub 2019/03/15. doi: 10.1128/jvi.00032-19. PubMed PMID: 30867298; PubMed Central  
756 PMCID: PMCPMC6498038.
- 757 60. Carey MF, Peterson CL, Smale ST. The primer extension assay. *Cold Spring Harb Protoc.*  
758 2013;2013(2):164-73. Epub 2013/02/05. doi: 10.1101/pdb.prot071902. PubMed PMID: 23378648.  
759

760 **Figure captions**

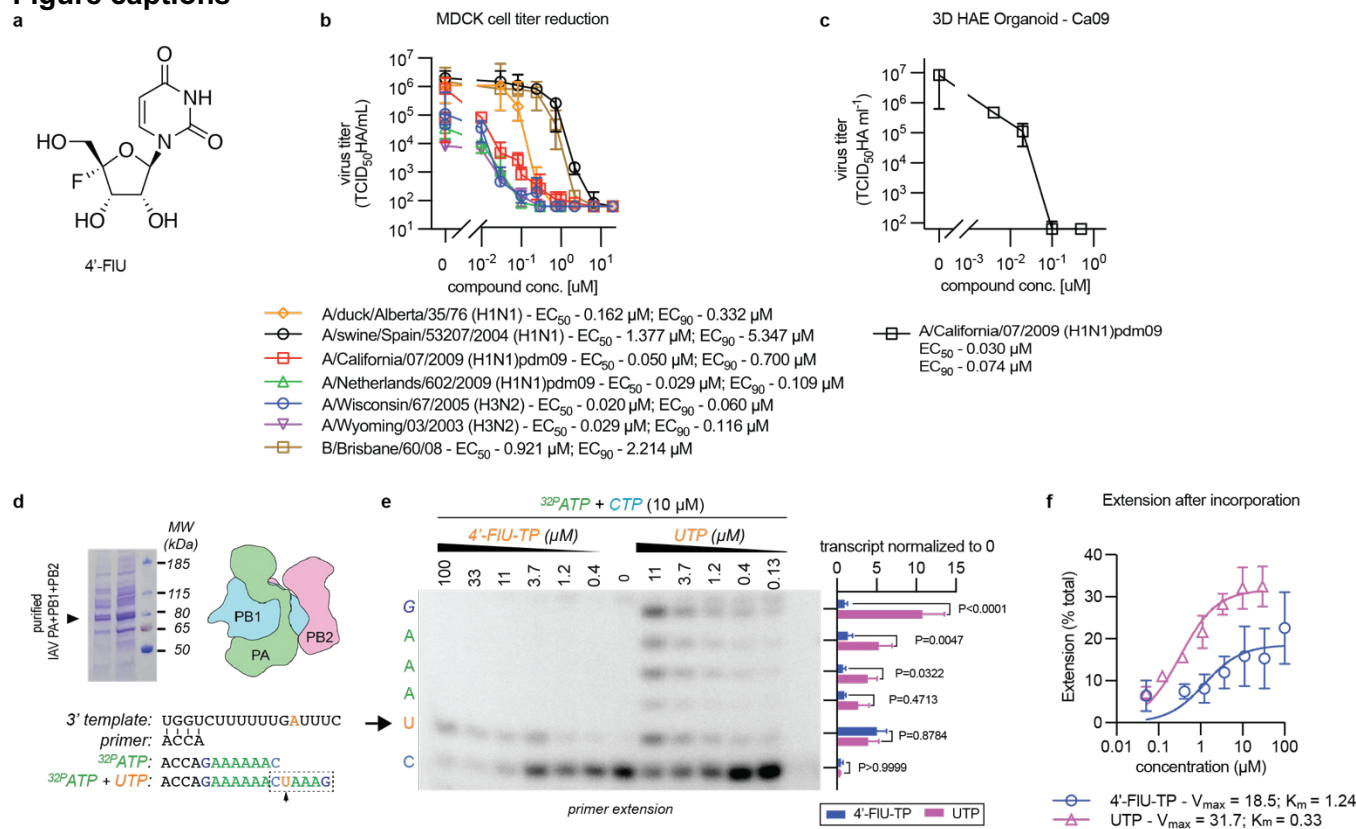

761

762 **Figure 1: In vitro potency and MOA of 4'-FIU against influenza viruses. a)** Structure of 4'-FIU. **b)** Dose-

763 response assay of 4'-FIU on MDCK cells. Cells were infected with different subtype IAV or with an IBV

764 isolate. Lines represent 4-parameter variable slope regression model, symbols show data median with

765 95% CI (n=3); EC<sub>50</sub> and EC<sub>90</sub> values are given. **c)** Dose-response assay of 4'-FIU on a well-

766 differentiated HAE organoid against Ca09. Compound was added to the basolateral chamber; line

767 connects data median of apically shed virus, error bars represent 95% CI; EC<sub>50</sub> and EC<sub>90</sub> values are

768 shown; n=3. **d)** Coomassie blue staining of purified recombinant IAV RdRP proteins after gel

769 electrophoresis and RNA template sequences used in primer extension assays. **e)** In vitro RdRP assay

770 in the presence of <sup>32</sup>P-ATP, CTP, and UTP or 4'-FIU-TP as indicated. Representative autoradiogram

771 showing the sequence section highlighted by dashed box in (d); the first incorporation of UTP or 4'-FIU-

772 TP is after position *i*=8 of the amplicon (arrow). The sequence of the amplicon and results of

773 phosphoimager-quantitation of relative signal intensities observed in the presence of 11 μM UTP or 4'-

774 FIU-TP are specified to the left and right of the autoradiogram, respectively. Quantitation graph shows

775 mean values of independent experiments (n=3) ± SD; analysis with 1-way ANOVA with Dunnett's *post*

776 *hoc* test; P values are shown in the graph. Uncropped autoradiogram and replicates are provided in (S2  
 777 Fig). **f**) Kinetic analysis of 4'-FIU-TP and UTP incorporation into the amplicon shown in (e) and (S2 Fig).  
 778 Lines represent non-linear regression kinetics with Michaelis-Menten model,  $K_m$  and  $V_{max}$  are shown,  
 779 error bars represent 95% CI.

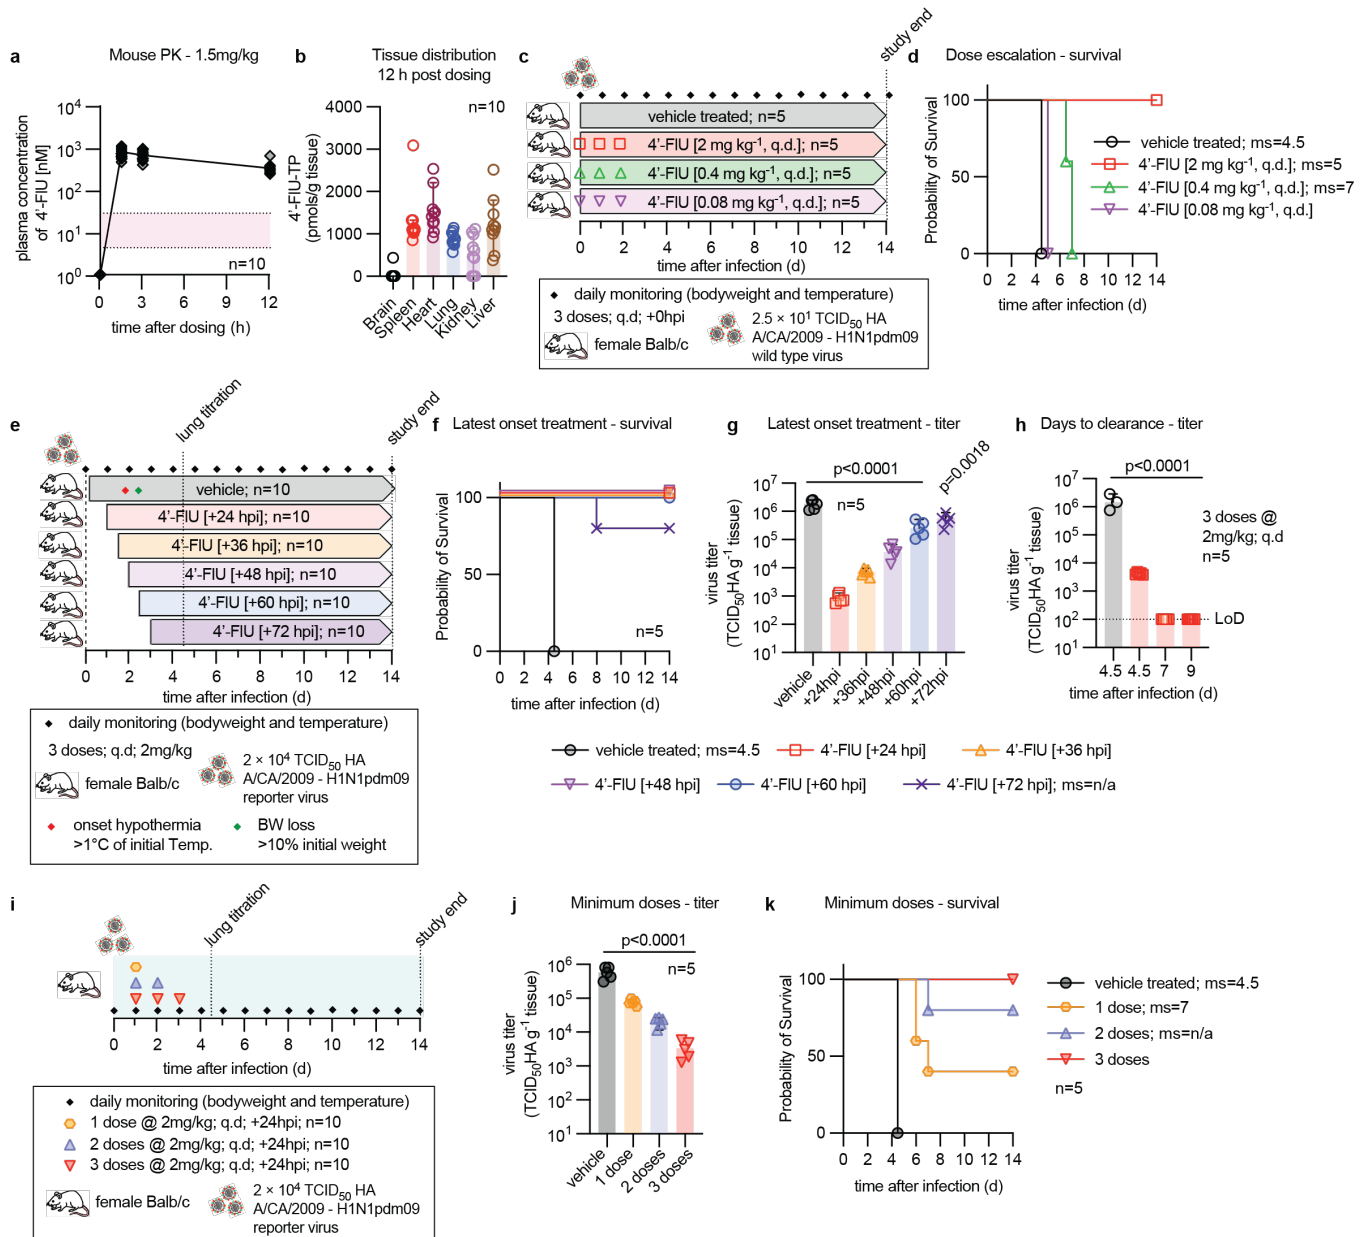

780  
 781 **Figure 2:** Treatment paradigms of 4'-FIU in mice. **a)** Mouse plasma exposure after a single oral dose of  
 782 1.5 mg/kg bodyweight. The red area denotes cell culture EC<sub>90</sub> ± 1 × SD against WSN, all donors as  
 783 shown in (S1 Fig). **b)** Tissue distribution of bioactive anabolite 4'-FIU-TP in animals shown in (a) 12  
 784 hours after dosing. **c)** Schematic of dose-to-failure study against standard recA/CA/2009 (H1N1). **d)**

785 Survival of animals treated as specified in (c). Median survival (ms) time in days is specified; Kaplan-  
786 Meier simple survival analysis. **e)** Study schematic to determine the therapeutic time window of oral 4'-  
787 FIU in mice, using recA/CA/2009-maxGFP-HA (H1N1) as viral target. **f)** Survival of animals treated as  
788 specified in (e). Median survival (ms) time in days is specified; Kaplan-Meier simple survival analysis.  
789 **g)** Lung viral load of a set of animals treated as in (e) was determined 4.5 days after infection. **h)** Time-  
790 to-viral-clearance study. Mice were infected and treated with 4'-FIU at 2 mg/kg starting 24 hours after  
791 infection and continued q.d. Lung virus load was determined in vehicle-treated animals 4.5 days after  
792 infection, and in 4'-FIU-treated animals 4.5, 7, and 9 days after infection. **i)** Schematic of minimal-  
793 number-of-doses finding study. **j)** Lung viral load of animals treated as in (i), determined 4.5 days after  
794 infection. **k)** Survival of a set of animals treated as in (i). Median survival (ms) time in days is specified;  
795 Kaplan-Meier simple survival analysis. Columns in (b, g, h, j) represent data medians with 95% CI,  
796 symbols specify individual animals; statistical analysis in (g, h, j) with 1-way ANOVA with Dunnett's *post*  
797 *hoc* test.

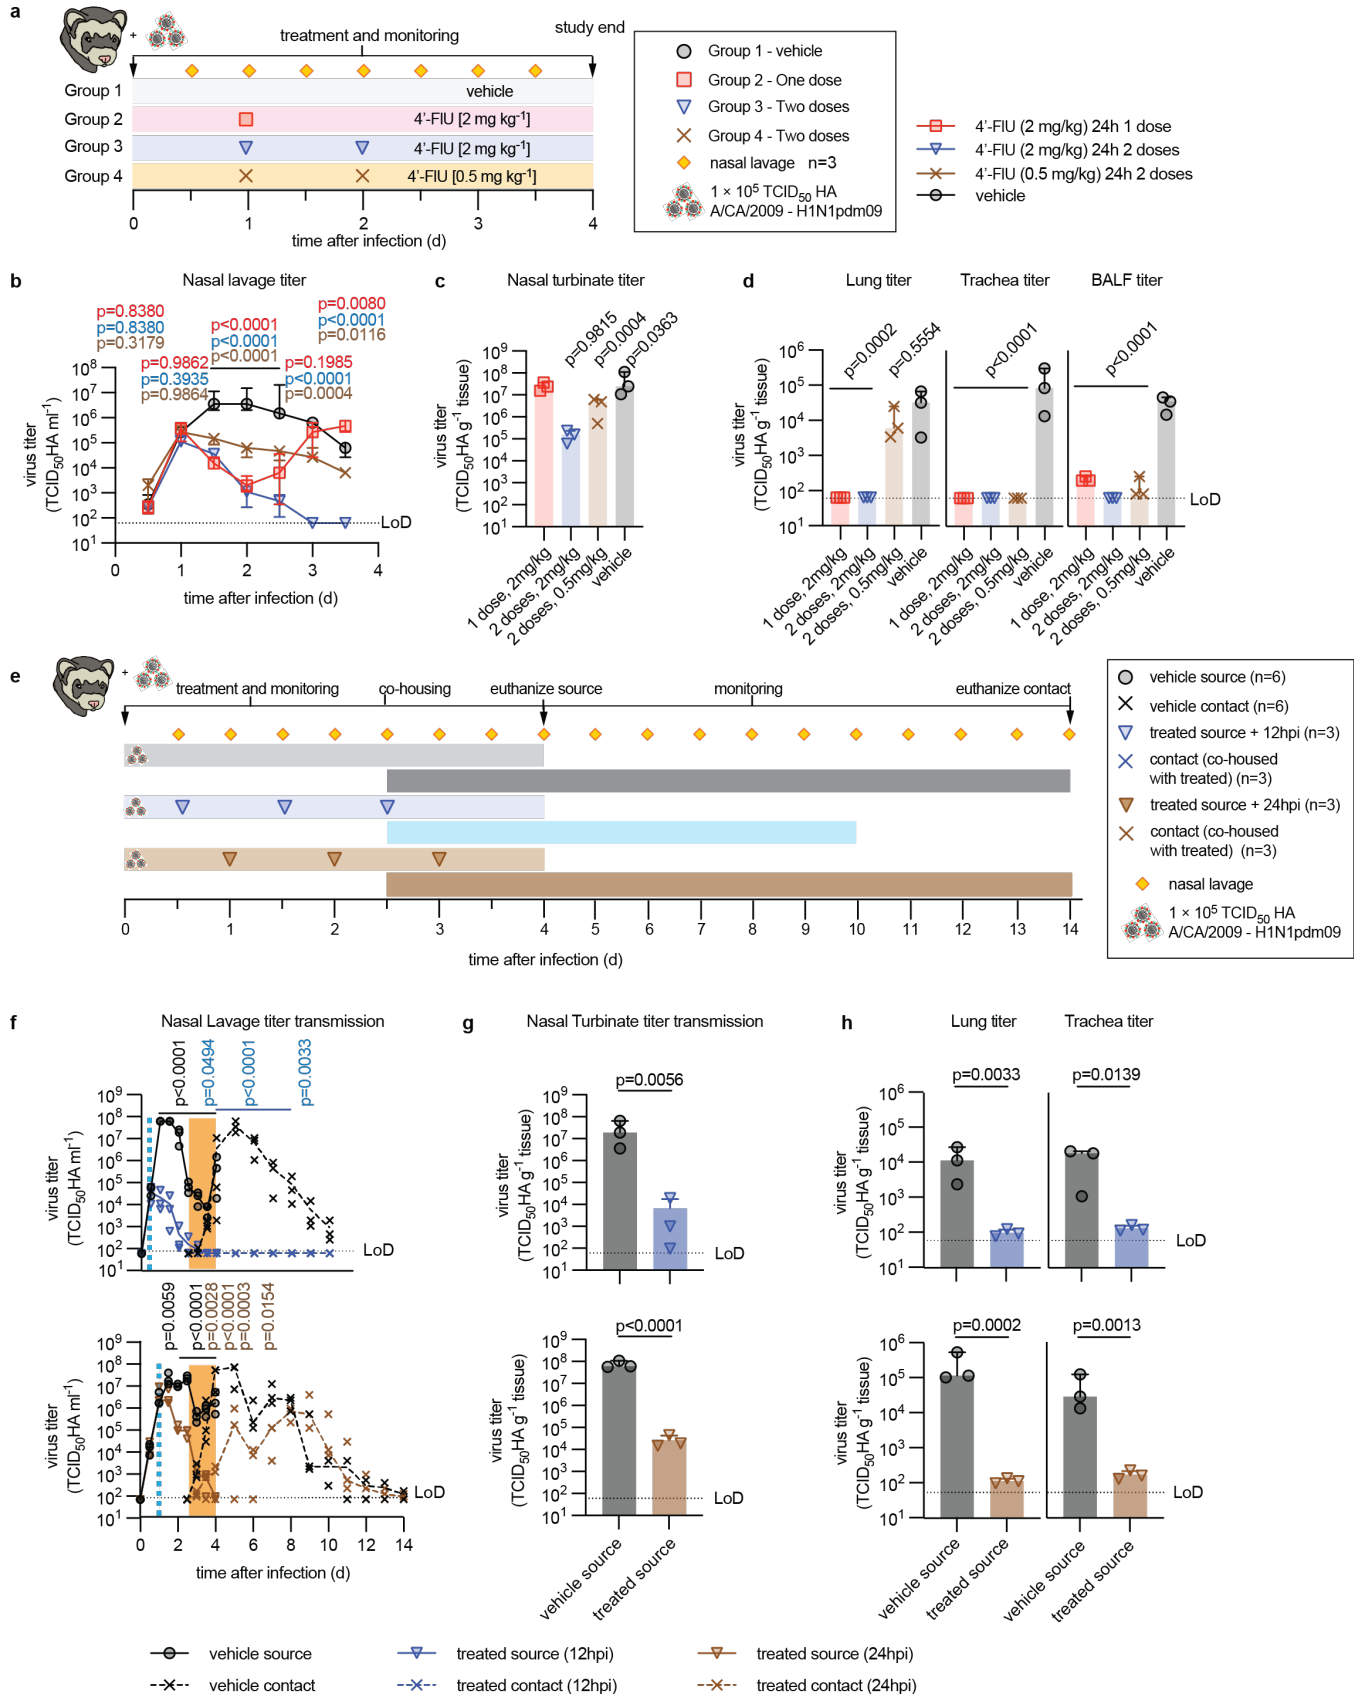

799 **Figure 3:** *In vivo* efficacy of 4'-FIU in the ferret transmission model. **a)** Ferret efficacy study schematic.  
800 **b)** Ferret shed viral titers in nasal lavages. Symbols represent data medians with 95% CI; 2-way  
801 ANOVA with Tukey's *post hoc* test, P values are specified; n=3. **c-d)** Tissue and BALF viral titers  
802 determined 4 days after infection. Columns represent data medians with 95% CI, symbols specify  
803 individual animals; 1-way ANOVA with Dunnett's *post hoc* test, P values are specified. **e)** Transmission  
804 study schematic. Treatment of source ferrets was started 12 or 24 hours after infection, animals were  
805 co-housed with untreated contact ferrets 2.5 days after infection. **f)** Ferret shed viral titers in nasal  
806 lavages of source animals and their sentinels. Light blue dashed line marks time of treatment onset;  
807 orange box highlights co-housing period. Symbols represent data medians with 95% CI; 2-way ANOVA  
808 with Tukey's *post hoc* test, P values are specified (P values in black compare source animals, P values  
809 in blue and brown compare contact ferrets). **g-h)** Virus load in nasal turbinates (g) and lung and trachea  
810 tissues (h) in source animals, collected 4 days after infection, respectively. Columns represent data  
811 medians with 95% CI; symbols show individual animals; unpaired t-test, P values are specified.

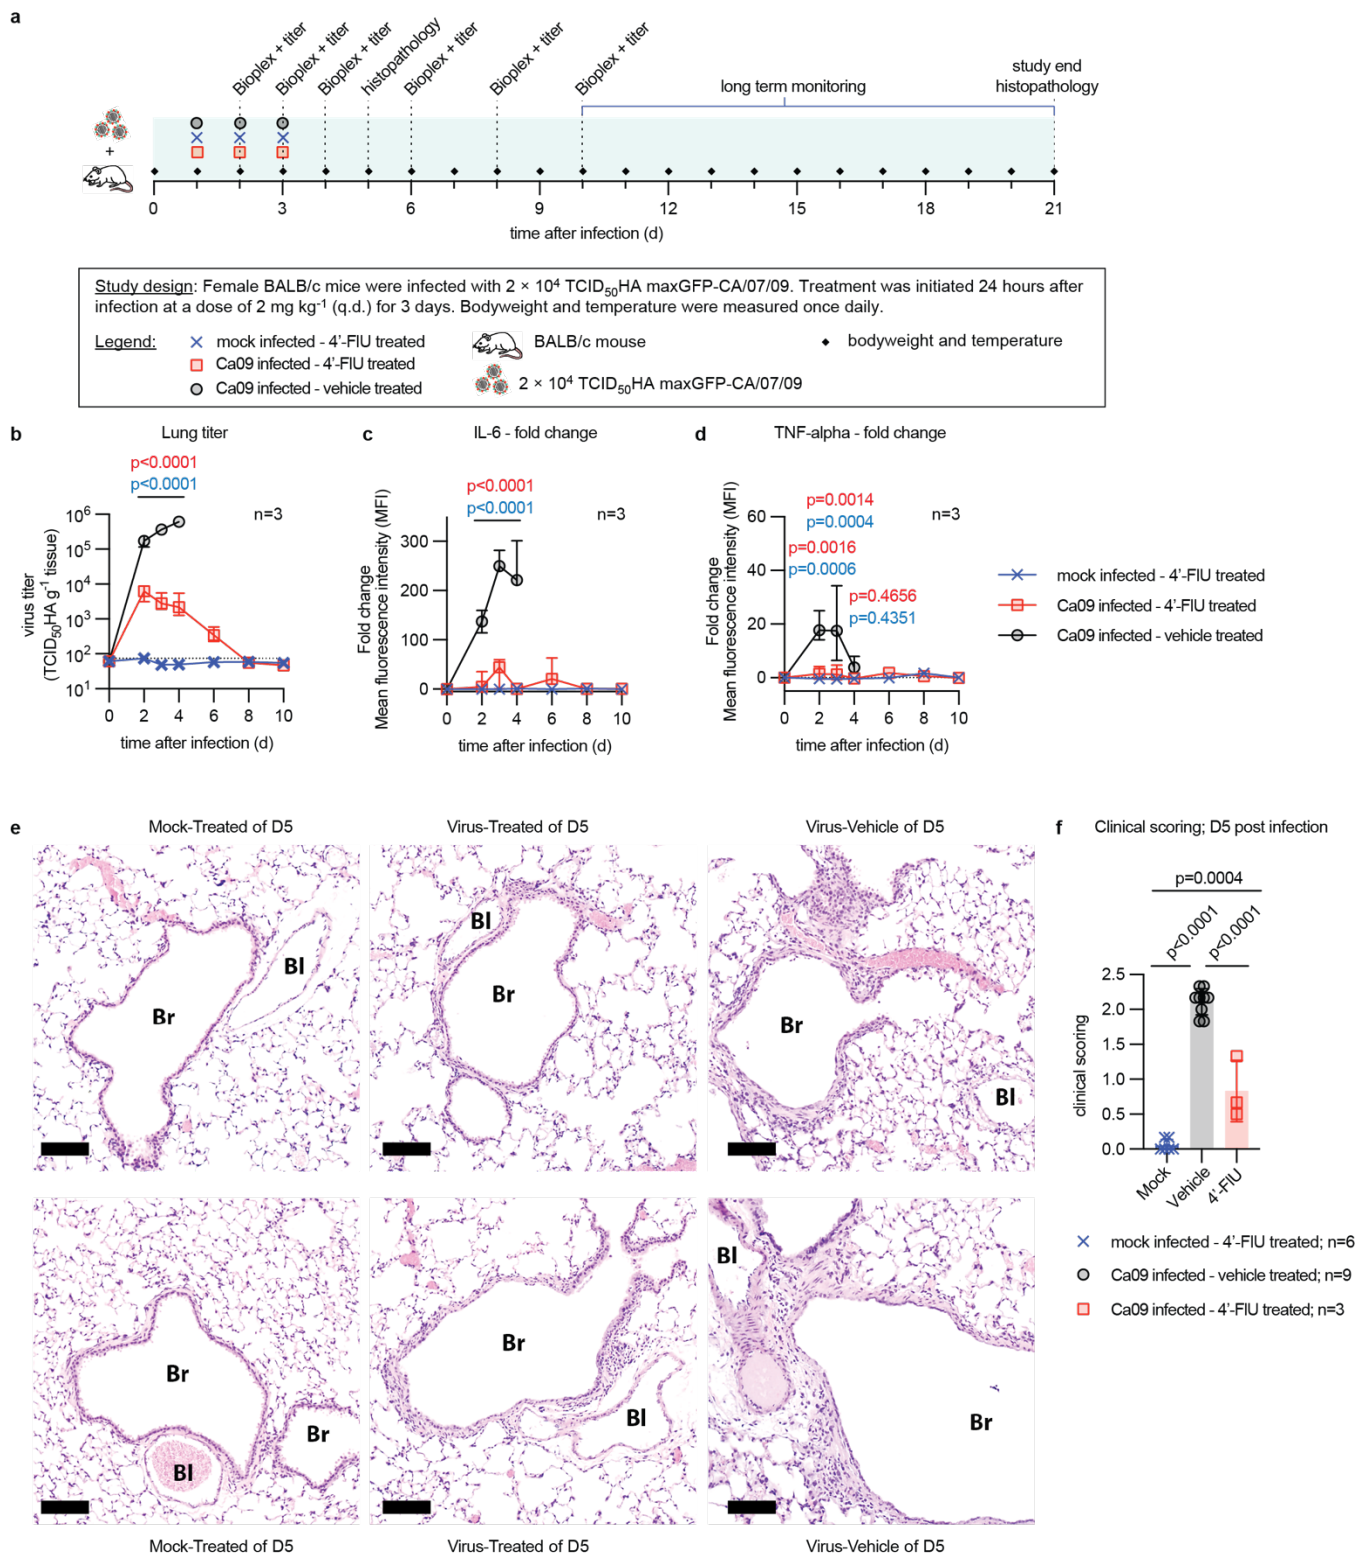

812

813 **Figure 4:** Effect of 4'-FIU on the antiviral immune response and lung histopathology. **a)** *In vivo* Bioplex

814 and histopathology study schematic. **b)** Lung viral titers in animals treated as in (a). **c-d)** Changes in IL-

815 6 (c) and TNF- $\alpha$  (d) levels present in BALF of animals treated as in (a), relative to levels at time of

816 infection. Symbols in (b-d) represent data medians with 95% CI; 2-way ANOVA with Tukey's *post hoc*



817 test; P values are shown. **e)** Representative photomicrographs of lung tissue extracted 5 days after  
818 infection of animals treated as in (a). Tissues of two individual animals per study arm are shown at 10×  
819 magnification; scale bar denotes 100 µm; Br, Bronchiole; BV, Blood vessel. **f)** Histopathology scores of  
820 animals treated as in (a). Lungs were extracted 5 days after infection. Scores for each animal  
821 represents a mean of individual alveolitis, bronchiolitis, vasculitis, pleuritis, perivascular cuffing (PVC),  
822 and interstitial pneumonia (IP) scores. Columns represent data medians with 95% CI; symbols show  
823 mean scores for each individual animal; 1-way ANOVA with Dunnett's *post hoc* test, P values and n  
824 values for each study arm are specified.

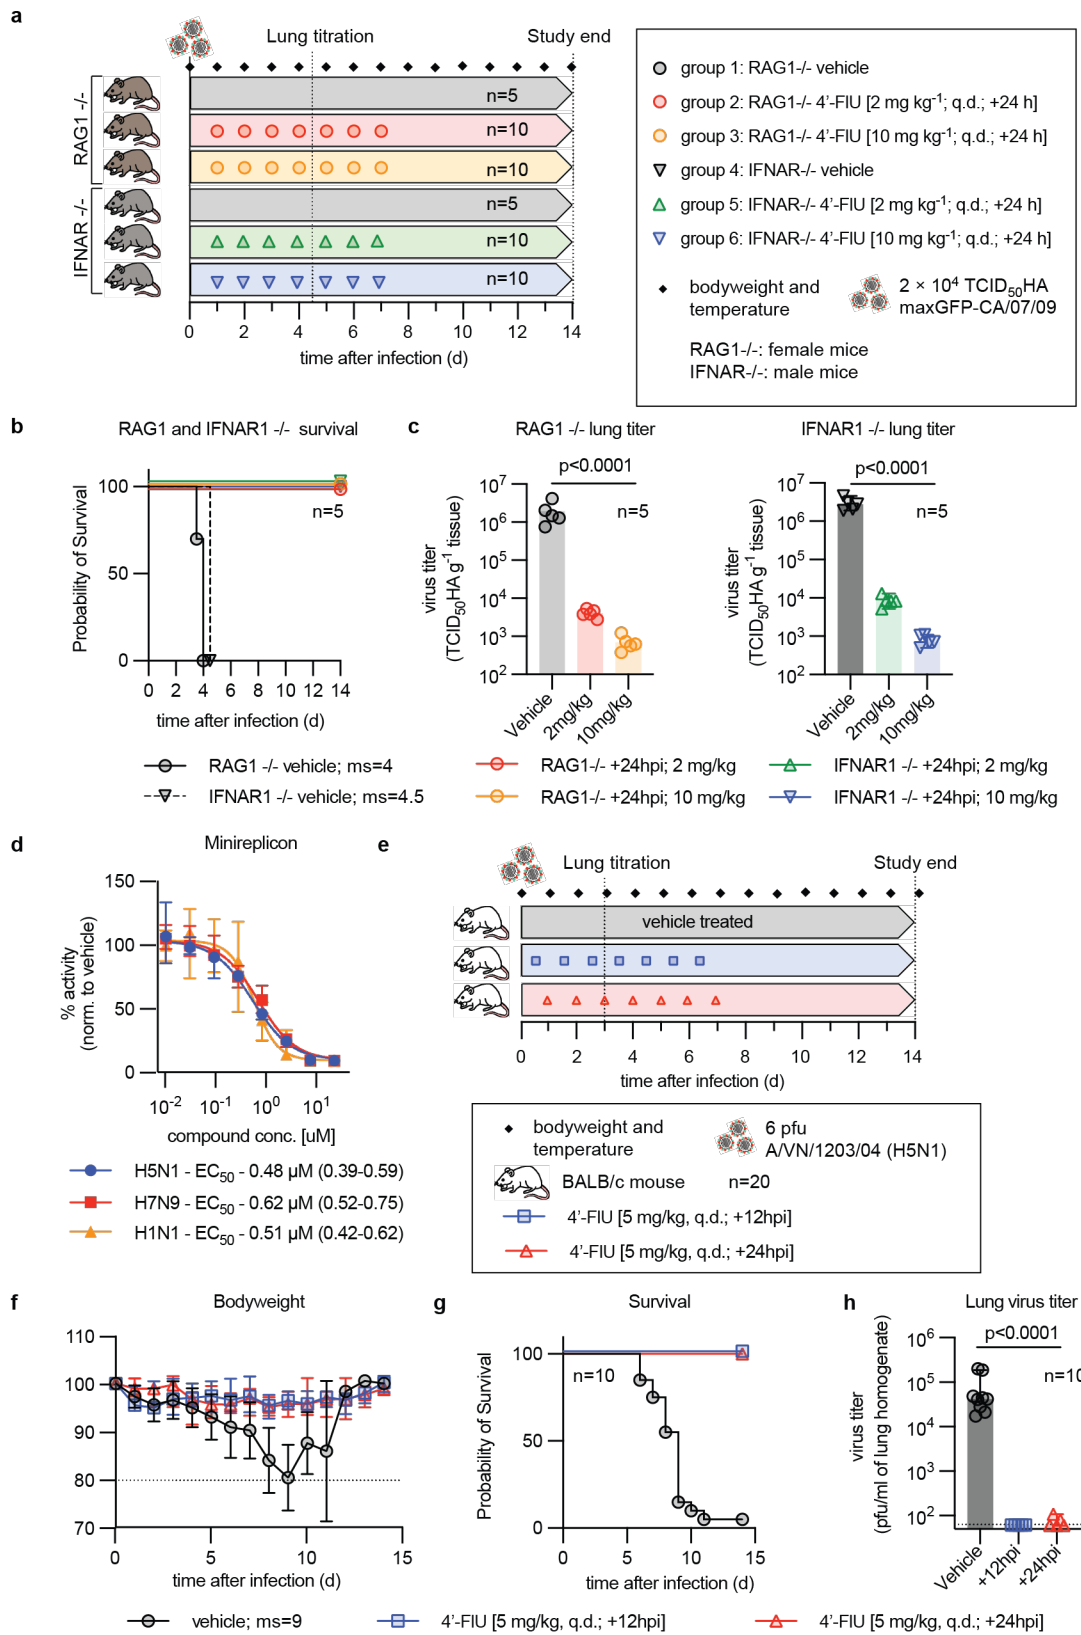

825

826 **Figure 5: Efficacy of 4'-FIU in an immunocompromised host and against HPAI. a)** Efficacy study

827 schematic in immunocompromised mice, lacking B and T cells (RAG1 KO) or IFN1 receptor function

828 (IFNar1 KO). **b)** Survival study of animals treated as shown in (a). Median survival (ms) time in days is  
 829 specified; Kaplan-Meier simple survival analysis. **c)** Lung viral load in animals from (a), determined 4.5  
 830 days after infection. Columns represent data medians with 95% CI; symbols show individual animals; 1-  
 831 way ANOVA with Dunnett's *post hoc* test, P values are specified. **d)** Dose-response minigenome assay  
 832 with RdRP complexes derived from IAV subtypes H1N1, H5N1, and H7N9. Lines represent 4-  
 833 parameter variable slope regression models; symbols show data medians with 95% CI; n=3. EC<sub>50</sub>  
 834 concentrations and 95% CI are specified. **e)** Efficacy study schematic of 4'-FIU against HPAI H5N1. **f)**  
 835 Body weight measurements of animals shown in (e). Symbols represent data means ± SD, normalized  
 836 to animal body weight at study start. **g)** Survival study of animals infected with HPAI and treated as  
 837 shown in (e). Median survival (ms) time in days is specified; Kaplan-Meier simple survival analysis. **h)**  
 838 Lung virus load on day 3 after infection. Columns represent data medians with 95% CI; symbols show  
 839 individual animals; 1-way ANOVA with Dunnett's *post hoc* test; P values and n values are specified.

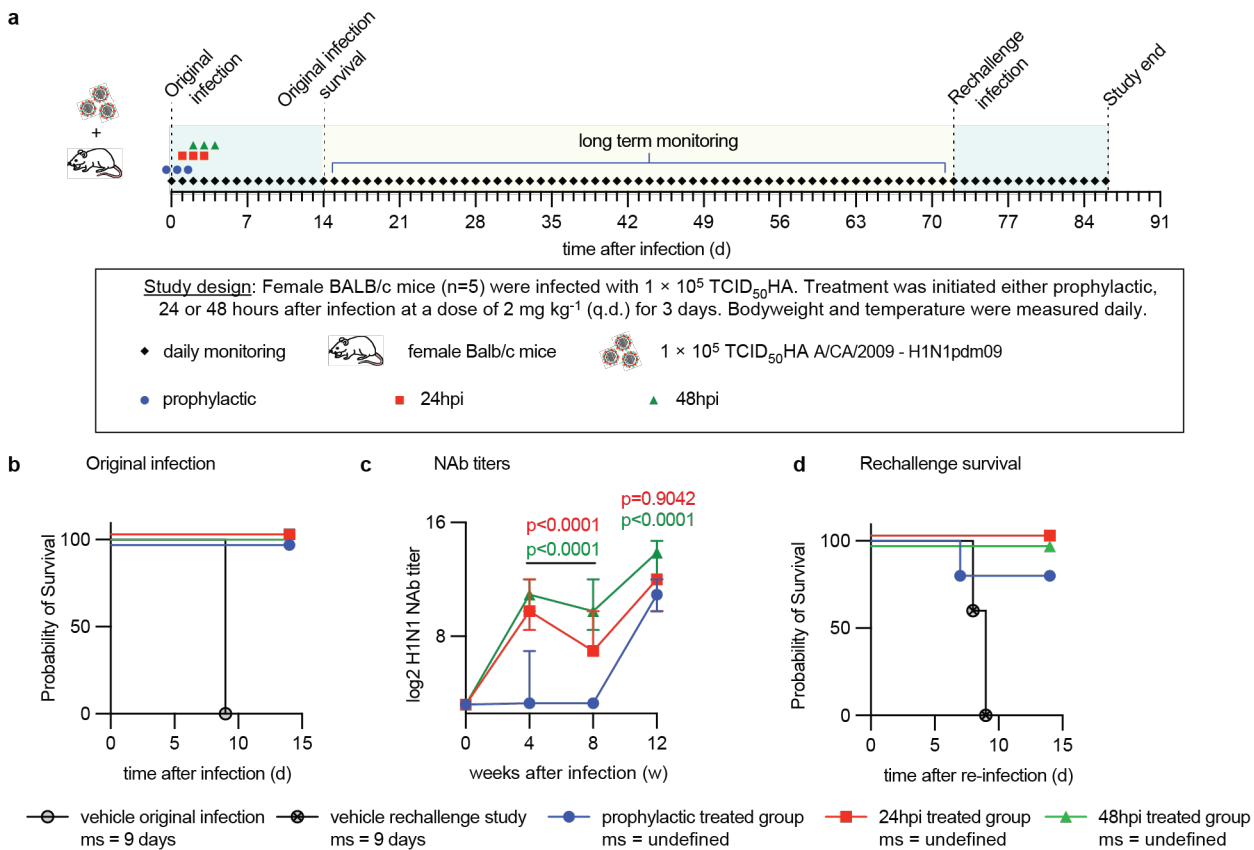

840

841 **Figure 6:** Reinfection of 4'-FIU-experienced animals with homotypic H1N1. **a)** Schematic of the  
 842 treatment and reinfection study. For infection and reinfection, mice received aerosolized Ca09. **b)**

843 Survival study of animals infected, treated, and reinfected as shown in (a). Median survival (ms) time in  
844 days is specified; Kaplan-Meier simple survival analysis. **c)** Anti-H1N1 neutralizing antibody (nAb) titers  
845 developing in animals from (a). Symbols represent data medians with 95% CI; 2-way ANOVA with  
846 Tukey's *post hoc* test; P values are specified. **d)** Survival of animals after re-infection. Median survival  
847 (ms) time in days is specified; Kaplan-Meier simple survival analysis. N numbers for animals in (a-d)  
848 are specified in (a).
